# Supplementary material for: CRISPR/Cas9-Mediated Whole Genomic Wide Knockout Screening Identifies Specific Genes Related to Mineral Absorption Involving in PM2.5 Liver Toxicity
Source: Research Square preprint supplement (doi:10.21203/rs.3.rs-87265/v1), 2020-10-09
Supplement: Supplementary file 1 [file ef873a297441ca3b2584159e.xlsx]

## Sheet: Sheet1
Gene	Sum	Avg	count	sgRNA
DEFB129	1826	304.333	6	HGLibA_12892,104|HGLibB_12875,188|HGLibB_12874,619|HGLibA_12891,372|HGLibA_12890,152|HGLibB_12876,391
CPSF7	1146	191	6	HGLibA_11015,351|HGLibB_11004,98|HGLibB_11002,343|HGLibB_11003,158|HGLibA_11014,29|HGLibA_11016,167
RFTN2	1006	167.667	6	HGLibA_40954,194|HGLibA_40952,43|HGLibA_40953,1|HGLibB_40902,402|HGLibB_40903,159|HGLibB_40901,207
OR13D1	714	119	6	HGLibA_33615,84|HGLibA_33613,116|HGLibA_33614,100|HGLibB_33568,153|HGLibB_33569,200|HGLibB_33570,61
IL10RB	626	104.333	6	HGLibB_22919,158|HGLibB_22918,43|HGLibA_22949,172|HGLibA_22951,103|HGLibA_22950,149|HGLibB_22920,1
VSIG1	616	102.667	6	HGLibA_53835,94|HGLibB_53769,88|HGLibB_53770,137|HGLibA_53836,94|HGLibA_53837,85|HGLibB_53771,118
CLDN12	1934	386.8	5	HGLibB_09847,1254|HGLibB_09846,93|HGLibB_09848,99|HGLibA_09855,198|HGLibA_09856,290|HGLibA_09857,0
ALPI	1395	279	5	HGLibB_01694,1|HGLibA_01696,160|HGLibA_01698,401|HGLibB_01695,46|HGLibB_01696,787|HGLibA_01697,0
DIRAS1	1249	249.8	5	HGLibA_13256,486|HGLibA_13255,154|HGLibB_13238,82|HGLibA_13257,100|HGLibB_13237,427|HGLibB_13239,0
DOK4	1219	243.8	5	HGLibB_13754,420|HGLibA_13777,360|HGLibA_13776,99|HGLibB_13756,138|HGLibB_13755,202|HGLibA_13775,0
NEU2	1209	241.8	5	HGLibB_31671,257|HGLibB_31669,50|HGLibA_31713,443|HGLibB_31670,171|HGLibA_31714,288|HGLibA_31712,0
SIRT7	1086	217.2	5	HGLibB_44182,91|HGLibA_44234,91|HGLibA_44233,126|HGLibB_44180,473|HGLibB_44181,305|HGLibA_44235,0
ATP1B2	979	195.8	5	HGLibB_03595,257|HGLibB_03594,245|HGLibB_03593,301|HGLibA_03597,26|HGLibA_03596,150|HGLibA_03595,0
LOC643802	958	191.6	5	HGLibB_26931,35|HGLibA_26971,231|HGLibA_26973,421|HGLibB_26932,145|HGLibB_26933,126|HGLibA_26972,0
OCM2	952	190.4	5	HGLibB_33215,70|HGLibB_33216,158|HGLibA_33261,110|HGLibA_33260,1|HGLibB_33217,613|HGLibA_33259,0
TAS2R42	950	190	5	HGLibA_48408,240|HGLibA_48409,30|HGLibB_48348,333|HGLibB_48349,275|HGLibB_48350,72|HGLibA_48407,0
SERP1	933	186.6	5	HGLibB_43445,157|HGLibB_43446,158|HGLibA_43500,65|HGLibB_43447,219|HGLibA_43499,334|HGLibA_43498,0
CDH17	931	186.2	5	HGLibA_08651,489|HGLibB_08643,136|HGLibA_08650,63|HGLibB_08644,76|HGLibB_08642,167|HGLibA_08649,0
FKBP14	876	175.2	5	HGLibA_17558,269|HGLibB_17534,201|HGLibB_17535,70|HGLibA_17559,266|HGLibB_17536,70|HGLibA_17557,0
CALML5	873	174.6	5	HGLibA_07036,45|HGLibA_07038,72|HGLibB_07032,77|HGLibB_07031,99|HGLibB_07033,580|HGLibA_07037,0
HSPA6	847	169.4	5	HGLibA_22293,86|HGLibB_22263,191|HGLibB_22262,189|HGLibB_22264,295|HGLibA_22292,86|HGLibA_22291,0
C17orf105	828	165.6	5	HGLibB_05522,166|HGLibA_05525,83|HGLibA_05526,178|HGLibA_05524,90|HGLibB_05520,311|HGLibB_05521,0
ZNF347	822	164.4	5	HGLibB_55786,358|HGLibB_55785,1|HGLibA_55853,253|HGLibB_55784,174|HGLibA_55852,36|HGLibA_55851,0
BHLHE40	814	162.8	5	HGLibB_04477,69|HGLibA_04479,6|HGLibA_04478,87|HGLibB_04476,375|HGLibB_04478,277|HGLibA_04480,0
TM4SF4	813	162.6	5	HGLibB_49643,184|HGLibB_49644,112|HGLibA_49702,177|HGLibA_49704,88|HGLibB_49642,252|HGLibA_49703,0
SCTR	789	157.8	5	HGLibB_43013,80|HGLibB_43015,451|HGLibA_43068,87|HGLibB_43014,93|HGLibA_43066,78|HGLibA_43067,0
NYAP1	788	157.6	5	HGLibA_33181,91|HGLibB_33136,172|HGLibA_33180,185|HGLibB_33135,147|HGLibA_33179,193|HGLibB_33137,0
CD84	785	157	5	HGLibA_08465,90|HGLibB_08459,109|HGLibA_08464,92|HGLibB_08457,184|HGLibB_08458,310|HGLibA_08466,0
OR4C12	783	156.6	5	HGLibA_33941,176|HGLibB_33896,214|HGLibA_33940,154|HGLibA_33942,81|HGLibB_33897,158|HGLibB_33895,0
HMGCS1	756	151.2	5	HGLibA_21711,79|HGLibB_21684,173|HGLibB_21683,206|HGLibA_21712,51|HGLibB_21682,247|HGLibA_21710,0
SATB2	730	146	5	HGLibA_42780,82|HGLibA_42779,23|HGLibA_42778,92|HGLibB_42725,331|HGLibB_42727,202|HGLibB_42726,0
SLC26A7	729	145.8	5	HGLibB_44751,94|HGLibA_44803,107|HGLibB_44752,441|HGLibA_44804,3|HGLibB_44750,84|HGLibA_44805,0
ELOVL7	724	144.8	5	HGLibB_14953,269|HGLibA_14974,85|HGLibA_14976,163|HGLibB_14954,158|HGLibB_14952,49|HGLibA_14975,0
BANF2	670	134	5	HGLibA_04144,98|HGLibB_04142,114|HGLibA_04143,77|HGLibB_04141,202|HGLibB_04140,179|HGLibA_04142,0
GKN1	658	131.6	5	HGLibA_19209,1|HGLibB_19183,225|HGLibB_19184,79|HGLibB_19182,168|HGLibA_19208,185|HGLibA_19207,0
SNRPB	646	129.2	5	HGLibB_45913,243|HGLibB_45911,46|HGLibA_45967,169|HGLibA_45968,75|HGLibB_45912,113|HGLibA_45969,0
ASCL5	642	128.4	5	HGLibB_03276,344|HGLibA_03278,83|HGLibB_03277,64|HGLibA_03279,94|HGLibB_03275,57|HGLibA_03277,0
BBS10	618	123.6	5	HGLibB_04207,85|HGLibB_04206,90|HGLibB_04208,264|HGLibA_04209,86|HGLibA_04208,93|HGLibA_04210,0
ATP5J	607	121.4	5	HGLibB_03668,90|HGLibA_03671,214|HGLibA_03669,90|HGLibB_03669,102|HGLibB_03667,111|HGLibA_03670,0
LCE3B	606	121.2	5	HGLibA_26134,87|HGLibA_26133,179|HGLibB_26097,93|HGLibB_26096,78|HGLibA_26132,169|HGLibB_26095,0
PCDH7	592	118.4	5	HGLibB_35367,1|HGLibA_35415,40|HGLibB_35368,225|HGLibB_35369,271|HGLibA_35414,55|HGLibA_35416,0
PARP16	587	117.4	5	HGLibB_35183,111|HGLibA_35229,48|HGLibB_35184,69|HGLibA_35228,192|HGLibB_35182,167|HGLibA_35230,0
PPP2R3A	570	114	5	HGLibB_38105,116|HGLibA_38154,79|HGLibB_38107,293|HGLibB_38106,1|HGLibA_38155,81|HGLibA_38156,0
SP8	560	112	5	HGLibA_46314,97|HGLibB_46260,98|HGLibA_46315,69|HGLibB_46259,225|HGLibB_46258,71|HGLibA_46316,0
WRAP73	558	111.6	5	HGLibB_54337,1|HGLibA_54402,94|HGLibA_54403,180|HGLibB_54336,50|HGLibA_54404,233|HGLibB_54338,0
PLEKHA8	555	111	5	HGLibA_37082,49|HGLibB_37036,83|HGLibA_37084,257|HGLibB_37037,89|HGLibA_37083,77|HGLibB_37035,0
DDX24	551	110.2	5	HGLibA_12678,181|HGLibA_12677,154|HGLibB_12665,87|HGLibB_12663,72|HGLibA_12679,57|HGLibB_12664,0
CDR1	521	104.2	5	HGLibA_08864,197|HGLibB_08855,73|HGLibB_08856,92|HGLibA_08863,1|HGLibB_08857,158|HGLibA_08862,0
ASIC5	511	102.2	5	HGLibB_03310,197|HGLibA_03312,138|HGLibB_03309,74|HGLibA_03310,100|HGLibB_03308,2|HGLibA_03311,0
NPC1L1	505	101	5	HGLibB_32378,151|HGLibA_32421,52|HGLibB_32376,73|HGLibA_32420,145|HGLibA_32422,84|HGLibB_32377,0
FUT3	504	100.8	5	HGLibA_18191,52|HGLibA_18190,139|HGLibA_18192,101|HGLibB_18165,147|HGLibB_18167,65|HGLibB_18166,0
AMHR2	480	96	5	HGLibA_01787,77|HGLibB_01785,106|HGLibA_01788,91|HGLibB_01784,170|HGLibB_01786,36|HGLibA_01786,0
RUNX3	473	94.6	5	HGLibB_42411,98|HGLibB_42412,62|HGLibB_42410,238|HGLibA_42465,1|HGLibA_42463,74|HGLibA_42464,0
SLC25A27	453	90.6	5	HGLibA_44689,43|HGLibB_44638,38|HGLibA_44690,56|HGLibB_44636,76|HGLibA_44691,240|HGLibB_44637,0
MYO1D	450	90	5	HGLibB_30786,288|HGLibA_30829,1|HGLibB_30787,21|HGLibB_30788,74|HGLibA_30830,66|HGLibA_30828,0
PHKA2	447	89.4	5	HGLibB_36358,79|HGLibA_36404,91|HGLibA_36405,135|HGLibB_36359,42|HGLibB_36357,100|HGLibA_36406,0
RDH13	435	87	5	HGLibA_40739,102|HGLibB_40690,89|HGLibA_40741,185|HGLibB_40688,58|HGLibB_40689,1|HGLibA_40740,0
AAGAB	431	86.2	5	HGLibB_00046,98|HGLibA_00048,70|HGLibB_00048,171|HGLibA_00046,22|HGLibA_00047,70|HGLibB_00047,0
PAGR1	430	86	5	HGLibA_35018,53|HGLibB_34974,81|HGLibA_35020,95|HGLibB_34972,99|HGLibB_34973,102|HGLibA_35019,0
PPIAL4A	424	84.8	5	HGLibA_37898,165|HGLibA_37897,1|HGLibB_37848,81|HGLibB_37849,73|HGLibB_37847,104
ADORA2B	408	81.6	5	HGLibA_01016,1|HGLibA_01015,77|HGLibB_01014,157|HGLibA_01017,89|HGLibB_01015,84|HGLibB_01013,0
LDB3	402	80.4	5	HGLibA_26216,87|HGLibB_26180,1|HGLibB_26179,136|HGLibA_26217,81|HGLibB_26181,97|HGLibA_26218,0
UPK2	399	79.8	5	HGLibB_53008,60|HGLibA_53073,94|HGLibB_53009,43|HGLibB_53010,96|HGLibA_53075,106|HGLibA_53074,0
MATN2	389	77.8	5	HGLibB_28388,125|HGLibA_28429,71|HGLibB_28390,76|HGLibB_28389,34|HGLibA_28431,83|HGLibA_28430,0
PAQR3	371	74.2	5	HGLibB_35110,79|HGLibA_35157,59|HGLibA_35158,79|HGLibA_35156,1|HGLibB_35111,153|HGLibB_35112,0
LOR	353	70.6	5	HGLibB_26990,179|HGLibA_27028,79|HGLibA_27029,15|HGLibA_27030,1|HGLibB_26988,79|HGLibB_26989,0
DGCR6	345	69	5	HGLibB_13032,1|HGLibA_13048,79|HGLibB_13030,78|HGLibB_13031,90|HGLibA_13050,97|HGLibA_13049,0
SYNDIG1	345	69	5	HGLibB_47912,7|HGLibA_47970,59|HGLibB_47910,84|HGLibA_47969,100|HGLibA_47971,95|HGLibB_47911,0
WDR3	343	68.6	5	HGLibB_53995,82|HGLibA_54060,96|HGLibA_54061,53|HGLibB_53994,21|HGLibB_53996,91|HGLibA_54062,0
TSPAN4	306	61.2	5	HGLibB_51872,70|HGLibA_51936,1|HGLibA_51937,87|HGLibB_51873,88|HGLibB_51871,60|HGLibA_51938,0
C1QTNF9B	249	49.8	5	HGLibB_05960,78|HGLibA_05963,1|HGLibB_05958,167|HGLibA_05964,1|HGLibB_05959,2|HGLibA_05962,0
EDARADD	1438	359.5	4	HGLibB_14418,57|HGLibB_14416,294|HGLibA_14440,697|HGLibA_14439,390|HGLibB_14417,0|HGLibA_14438,0
KLHL2	1349	337.25	4	HGLibB_25111,253|HGLibA_25147,202|HGLibB_25113,695|HGLibB_25112,199|HGLibA_25146,0|HGLibA_25148,0
PTGFR	1294	323.5	4	HGLibB_39290,847|HGLibB_39291,87|HGLibA_39340,93|HGLibA_39339,267|HGLibA_39341,0|HGLibB_39292,0
SCGB2A2	1292	323	4	HGLibA_42926,479|HGLibA_42925,645|HGLibA_42927,89|HGLibB_42874,79|HGLibB_42873,0|HGLibB_42872,0
DEAF1	1184	296	4	HGLibB_12754,238|HGLibB_12755,187|HGLibB_12753,518|HGLibA_12767,241|HGLibA_12768,0|HGLibA_12769,0
SOX5	1183	295.75	4	HGLibB_46211,68|HGLibA_46267,240|HGLibB_46212,93|HGLibB_46210,782|HGLibA_46268,0|HGLibA_46266,0
ADRM1	1178	294.5	4	HGLibB_01067,323|HGLibB_01068,99|HGLibB_01069,469|HGLibA_01070,287|HGLibA_01069,0|HGLibA_01071,0
DNAJC5	1112	278	4	HGLibA_13623,543|HGLibA_13625,98|HGLibB_13606,268|HGLibB_13604,203|HGLibA_13624,0|HGLibB_13605,0
ZNF605	1110	277.5	4	HGLibA_56364,640|HGLibB_56297,151|HGLibB_56299,97|HGLibA_56366,222|HGLibB_56298,0|HGLibA_56365,0
UAP1	1092	273	4	HGLibA_52506,1|HGLibA_52508,216|HGLibB_52442,706|HGLibB_52441,169|HGLibA_52507,0|HGLibB_52443,0
SLC25A39	1088	272	4	HGLibA_44729,86|HGLibB_44675,281|HGLibB_44677,78|HGLibB_44676,643|HGLibA_44730,0|HGLibA_44728,0
PARP12	1086	271.5	4	HGLibB_35174,350|HGLibA_35221,237|HGLibB_35173,80|HGLibB_35175,419|HGLibA_35220,0|HGLibA_35219,0
RBMY1D	1044	261	4	HGLibB_40567,598|HGLibA_40617,85|HGLibB_40566,359|HGLibA_40616,2
RTP4	1043	260.75	4	HGLibA_42430,95|HGLibB_42378,511|HGLibB_42379,373|HGLibB_42377,64|HGLibA_42432,0|HGLibA_42431,0
GIN1	1040	260	4	HGLibA_19098,504|HGLibA_19096,287|HGLibB_19071,81|HGLibB_19072,168|HGLibA_19097,0|HGLibB_19073,0
CACNA2D4	1031	257.75	4	HGLibA_06915,93|HGLibB_06910,1|HGLibB_06908,687|HGLibB_06909,250|HGLibA_06913,0|HGLibA_06914,0
CTRL	1026	256.5	4	HGLibA_11686,262|HGLibB_11673,314|HGLibA_11685,73|HGLibB_11674,377|HGLibA_11687,0|HGLibB_11675,0
ESRP1	1008	252	4	HGLibB_15565,92|HGLibB_15566,328|HGLibA_15587,77|HGLibB_15564,511|HGLibA_15586,0|HGLibA_15588,0
PLCG1	1007	251.75	4	HGLibA_37001,168|HGLibA_37002,209|HGLibB_36954,330|HGLibB_36956,300|HGLibA_37003,0|HGLibB_36955,0
ARAP1	998	249.5	4	HGLibB_02624,89|HGLibA_02626,763|HGLibA_02625,145|HGLibB_02622,1|HGLibA_02624,0|HGLibB_02623,0
OR5K1	993	248.25	4	HGLibB_34266,550|HGLibA_34311,94|HGLibB_34264,236|HGLibA_34309,113|HGLibA_34310,0|HGLibB_34265,0
BCL3	975	243.75	4	HGLibB_04327,472|HGLibB_04328,415|HGLibA_04329,1|HGLibA_04330,87|HGLibB_04326,0|HGLibA_04328,0
C1orf146	971	242.75	4	HGLibB_05770,449|HGLibB_05771,162|HGLibA_05774,171|HGLibB_05769,189|HGLibA_05773,0|HGLibA_05775,0
MPRIP	971	242.75	4	HGLibB_29735,83|HGLibB_29737,155|HGLibB_29736,662|HGLibA_29777,71|HGLibA_29778,0|HGLibA_29776,0
ZNF93	965	241.25	4	HGLibA_56911,71|HGLibB_56845,450|HGLibB_56844,371|HGLibA_56910,73|HGLibA_56912,0|HGLibB_56843,0
PRKCSH	960	240	4	HGLibB_38512,321|HGLibA_38561,387|HGLibB_38510,99|HGLibA_38559,153|HGLibA_38560,0|HGLibB_38511,0
PAPD7	949	237.25	4	HGLibA_35128,86|HGLibA_35126,446|HGLibB_35080,210|HGLibB_35081,207|HGLibA_35127,0|HGLibB_35082,0
LACTB2	949	237.25	4	HGLibB_25883,89|HGLibA_25919,349|HGLibB_25884,422|HGLibA_25920,89|HGLibB_25882,0|HGLibA_25921,0
OR2B2	924	231	4	HGLibB_33723,651|HGLibB_33721,108|HGLibB_33722,77|HGLibA_33767,88|HGLibA_33768,0|HGLibA_33766,0
OR1I1	921	230.25	4	HGLibA_33670,102|HGLibB_33626,249|HGLibA_33672,209|HGLibB_33625,361|HGLibB_33627,0|HGLibA_33671,0
PRDM2	919	229.75	4	HGLibA_38386,152|HGLibB_38338,540|HGLibA_38385,143|HGLibB_38336,84|HGLibA_38387,0|HGLibB_38337,0
PI4KB	912	228	4	HGLibB_36453,238|HGLibB_36455,322|HGLibA_36502,164|HGLibA_36501,188|HGLibB_36454,0|HGLibA_36500,0
GPR34	901	225.25	4	HGLibA_20026,183|HGLibB_19999,527|HGLibA_20025,119|HGLibA_20027,72|HGLibB_19998,0|HGLibB_19997,0
hsa-mir-378e	898	224.5	4	HGLibA_59447,363|HGLibA_59444,186|HGLibA_59445,257|HGLibA_59446,92
UBR4	896	224	4	HGLibA_52755,77|HGLibB_52692,306|HGLibA_52756,327|HGLibB_52690,186|HGLibA_52757,0|HGLibB_52691,0
KLHL28	895	223.75	4	HGLibA_25171,224|HGLibB_25137,176|HGLibB_25135,164|HGLibB_25136,331|HGLibA_25170,0|HGLibA_25172,0
NIPA2	878	219.5	4	HGLibB_31911,227|HGLibB_31910,240|HGLibB_31909,329|HGLibA_31952,82|HGLibA_31953,0|HGLibA_31954,0
ZNF775	872	218	4	HGLibA_56719,83|HGLibA_56718,129|HGLibB_56653,328|HGLibB_56652,332|HGLibA_56720,0|HGLibB_56651,0
NR4A3	864	216	4	HGLibB_32588,170|HGLibB_32587,299|HGLibA_32631,84|HGLibA_32630,311|HGLibB_32586,0|HGLibA_32632,0
ADRB2	851	212.75	4	HGLibB_01057,170|HGLibA_01058,333|HGLibB_01055,204|HGLibB_01056,144|HGLibA_01057,0|HGLibA_01059,0
ATP10A	851	212.75	4	HGLibB_03542,97|HGLibA_03545,88|HGLibB_03543,595|HGLibB_03544,71|HGLibA_03544,0|HGLibA_03546,0
DSTYK	849	212.25	4	HGLibB_14028,232|HGLibA_14050,358|HGLibB_14026,84|HGLibA_14048,175|HGLibB_14027,0|HGLibA_14049,0
GRB10	847	211.75	4	HGLibB_20195,149|HGLibA_20224,696|HGLibA_20223,1|HGLibA_20225,1|HGLibB_20196,0|HGLibB_20197,0
C2CD5	840	210	4	HGLibA_06108,199|HGLibA_06106,243|HGLibB_06102,353|HGLibB_06103,45|HGLibA_06107,0|HGLibB_06104,0
SIRT4	837	209.25	4	HGLibB_44173,145|HGLibA_44225,283|HGLibB_44171,80|HGLibB_44172,329|HGLibA_44224,0|HGLibA_44226,0
SERPINB3	835	208.75	4	HGLibA_43550,92|HGLibA_43549,105|HGLibA_43551,396|HGLibB_43497,242|HGLibB_43496,0
VAMP7_X	833	208.25	4	HGLibA_53503,175|HGLibB_53438,452|HGLibA_53502,149|HGLibB_53436,57|HGLibB_53437,0
LUM	833	208.25	4	HGLibB_27589,174|HGLibB_27588,542|HGLibA_27630,49|HGLibB_27590,68|HGLibA_27629,0|HGLibA_27628,0
OR10V1	833	208.25	4	HGLibA_33551,517|HGLibB_33505,64|HGLibB_33506,163|HGLibB_33507,89|HGLibA_33550,0|HGLibA_33552,0
AGTPBP1	831	207.75	4	HGLibB_01256,430|HGLibA_01258,65|HGLibB_01257,265|HGLibA_01259,71|HGLibA_01260,0|HGLibB_01258,0
ARHGAP1	830	207.5	4	HGLibB_02694,93|HGLibB_02696,477|HGLibA_02698,97|HGLibA_02696,163|HGLibB_02695,0|HGLibA_02697,0
TTC28	829	207.25	4	HGLibB_52030,390|HGLibA_52097,242|HGLibA_52095,96|HGLibB_52032,101|HGLibA_52096,0|HGLibB_52031,0
EPPIN	826	206.5	4	HGLibA_15356,421|HGLibB_15334,199|HGLibB_15333,163|HGLibA_15357,43|HGLibB_15335,0|HGLibA_15355,0
RIPPLY3	825	206.25	4	HGLibB_41281,108|HGLibA_41333,103|HGLibB_41282,423|HGLibB_41283,191|HGLibA_41334,0|HGLibA_41335,0
CYP4F11	822	205.5	4	HGLibB_12169,503|HGLibA_12181,269|HGLibA_12182,3|HGLibB_12168,47|HGLibA_12180,0|HGLibB_12167,0
OR52I1	817	204.25	4	HGLibA_34172,127|HGLibA_34171,169|HGLibA_34173,235|HGLibB_34128,286|HGLibB_34127,0|HGLibB_34126,0
MMP19	817	204.25	4	HGLibA_29503,239|HGLibA_29504,227|HGLibB_29462,84|HGLibA_29505,267|HGLibB_29464,0|HGLibB_29463,0
LOC649330	816	204	4	HGLibA_26982,184|HGLibA_26980,104|HGLibB_26942,417|HGLibA_26981,111|HGLibB_26941,0|HGLibB_26940,0
ADCY9	812	203	4	HGLibB_00931,74|HGLibA_00931,1|HGLibA_00932,415|HGLibB_00929,322|HGLibB_00930,0|HGLibA_00933,0
HSFY1	811	202.75	4	HGLibB_22213,455|HGLibB_22212,231|HGLibA_22241,91|HGLibA_22240,34|HGLibA_22242,0
NAT6	807	201.75	4	HGLibB_31138,377|HGLibA_31179,162|HGLibB_31136,71|HGLibA_31178,197|HGLibB_31137,0|HGLibA_31180,0
RFX8	805	201.25	4	HGLibB_40933,145|HGLibA_40982,188|HGLibB_40931,309|HGLibB_40932,163|HGLibA_40984,0|HGLibA_40983,0
PTPLB	802	200.5	4	HGLibB_39375,78|HGLibB_39374,360|HGLibB_39376,249|HGLibA_39424,115|HGLibA_39425,0|HGLibA_39423,0
KCNH6	800	200	4	HGLibA_24224,1|HGLibB_24190,137|HGLibB_24191,508|HGLibA_24226,154|HGLibA_24225,0|HGLibB_24192,0
SP100	799	199.75	4	HGLibA_46284,135|HGLibB_46228,499|HGLibB_46229,80|HGLibA_46286,85|HGLibA_46285,0|HGLibB_46230,0
RIC3	799	199.75	4	HGLibB_41179,92|HGLibB_41180,260|HGLibA_41231,400|HGLibA_41232,47|HGLibB_41181,0|HGLibA_41233,0
MZB1	798	199.5	4	HGLibB_30891,337|HGLibB_30893,67|HGLibB_30892,311|HGLibA_30934,83|HGLibA_30933,0|HGLibA_30935,0
ATP5G3	792	198	4	HGLibB_03658,71|HGLibA_03660,114|HGLibA_03662,283|HGLibA_03661,324|HGLibB_03659,0|HGLibB_03660,0
DPYS	786	196.5	4	HGLibB_13902,73|HGLibB_13901,98|HGLibA_13923,614|HGLibA_13922,1|HGLibB_13900,0|HGLibA_13924,0
APOC4	785	196.25	4	HGLibB_02509,131|HGLibA_02511,417|HGLibB_02511,165|HGLibB_02510,72|HGLibA_02512,0|HGLibA_02513,0
CCR6	780	195	4	HGLibA_08161,51|HGLibB_08154,383|HGLibB_08155,290|HGLibA_08162,56|HGLibB_08156,0|HGLibA_08163,0
FOXN2	779	194.75	4	HGLibB_17889,158|HGLibA_17911,184|HGLibB_17890,187|HGLibB_17888,250|HGLibA_17913,0|HGLibA_17912,0
FASN	778	194.5	4	HGLibA_16894,155|HGLibB_16873,90|HGLibB_16871,317|HGLibB_16872,216|HGLibA_16895,0|HGLibA_16896,0
ZNF835	776	194	4	HGLibA_56838,88|HGLibA_56839,232|HGLibB_56773,366|HGLibB_56772,90|HGLibB_56771,0|HGLibA_56840,0
KIAA0895L	774	193.5	4	HGLibA_24662,83|HGLibB_24626,278|HGLibA_24661,151|HGLibB_24627,262|HGLibA_24660,0|HGLibB_24628,0
ASB4	771	192.75	4	HGLibB_03236,70|HGLibA_03239,265|HGLibB_03237,265|HGLibA_03240,171|HGLibB_03238,0|HGLibA_03238,0
DPAGT1	771	192.75	4	HGLibB_13788,394|HGLibB_13787,208|HGLibB_13789,81|HGLibA_13810,88|HGLibA_13808,0|HGLibA_13809,0
ACKR4	770	192.5	4	HGLibB_00450,74|HGLibB_00449,65|HGLibA_00449,308|HGLibA_00450,323|HGLibB_00448,0|HGLibA_00448,0
CNTN4	769	192.25	4	HGLibB_10398,142|HGLibA_10409,277|HGLibB_10400,101|HGLibA_10411,249|HGLibB_10399,0|HGLibA_10410,0
GPATCH2	769	192.25	4	HGLibB_19710,451|HGLibB_19709,119|HGLibB_19711,40|HGLibA_19737,159|HGLibA_19738,0|HGLibA_19739,0
PTCHD3	766	191.5	4	HGLibA_39279,164|HGLibB_39232,398|HGLibA_39281,30|HGLibB_39230,174|HGLibB_39231,0|HGLibA_39280,0
C11orf49	765	191.25	4	HGLibA_05147,43|HGLibB_05145,432|HGLibB_05143,193|HGLibB_05144,97|HGLibA_05148,0|HGLibA_05149,0
MACROD1	764	191	4	HGLibB_27796,177|HGLibB_27794,305|HGLibA_27837,86|HGLibB_27795,196|HGLibA_27836,0|HGLibA_27835,0
ESRRB	764	191	4	HGLibA_15597,498|HGLibA_15596,150|HGLibB_15574,75|HGLibA_15595,41|HGLibB_15575,0|HGLibB_15573,0
SLC22A23	761	190.25	4	HGLibB_44521,96|HGLibA_44573,88|HGLibB_44520,77|HGLibB_44519,500|HGLibA_44574,0|HGLibA_44572,0
ESYT3	754	188.5	4	HGLibB_15589,183|HGLibB_15590,282|HGLibB_15588,199|HGLibA_15611,90|HGLibA_15612,0|HGLibA_15610,0
CCDC159	753	188.25	4	HGLibB_07662,252|HGLibA_07666,148|HGLibA_07667,81|HGLibB_07660,272|HGLibB_07661,0|HGLibA_07668,0
TUBB2A	753	188.25	4	HGLibB_52211,180|HGLibA_52275,285|HGLibB_52212,196|HGLibA_52276,92|HGLibB_52210,0|HGLibA_52277,0
KLRF2	752	188	4	HGLibA_25306,333|HGLibA_25305,111|HGLibB_25272,242|HGLibA_25307,66|HGLibB_25270,0|HGLibB_25271,0
PCBP3	750	187.5	4	HGLibB_35326,149|HGLibB_35325,76|HGLibB_35327,263|HGLibA_35374,262|HGLibA_35373,0|HGLibA_35372,0
CYCS	748	187	4	HGLibA_12027,150|HGLibA_12028,68|HGLibA_12029,67|HGLibB_12015,463|HGLibB_12016,0|HGLibB_12017,0
ABCD4	748	187	4	HGLibA_00200,206|HGLibB_00199,183|HGLibA_00201,209|HGLibB_00200,150|HGLibA_00199,0|HGLibB_00201,0
RELL2	746	186.5	4	HGLibA_40820,172|HGLibB_40771,261|HGLibB_40769,222|HGLibB_40770,91|HGLibA_40822,0|HGLibA_40821,0
CYP26B1	746	186.5	4	HGLibA_12088,460|HGLibB_12075,115|HGLibA_12089,83|HGLibA_12087,88|HGLibB_12074,0|HGLibB_12076,0
PRAMEF1	746	186.5	4	HGLibA_38277,155|HGLibA_38278,230|HGLibB_38228,38|HGLibB_38230,323|HGLibA_38279,0|HGLibB_38229,0
CLEC5A	746	186.5	4	HGLibA_09999,181|HGLibB_09992,155|HGLibB_09991,257|HGLibA_10001,153|HGLibA_10000,0|HGLibB_09990,0
IPO9	744	186	4	HGLibA_23477,338|HGLibB_23444,91|HGLibB_23446,225|HGLibA_23478,90|HGLibA_23479,0|HGLibB_23445,0
ZNF248	741	185.25	4	HGLibA_55661,80|HGLibA_55660,480|HGLibB_55592,48|HGLibB_55594,133|HGLibB_55593,0|HGLibA_55659,0
ZNF780A	740	185	4	HGLibB_56664,191|HGLibA_56732,173|HGLibA_56731,149|HGLibB_56665,227|HGLibB_56663,0|HGLibA_56730,0
OR8S1	740	185	4	HGLibA_34554,49|HGLibB_34507,590|HGLibA_34553,86|HGLibB_34509,15|HGLibB_34508,0|HGLibA_34552,0
ZC3H7B	736	184	4	HGLibB_54918,203|HGLibB_54919,145|HGLibA_54986,309|HGLibB_54917,79|HGLibA_54984,0|HGLibA_54985,0
MTL5	733	183.25	4	HGLibA_30404,68|HGLibB_30362,114|HGLibB_30360,477|HGLibA_30402,74|HGLibA_30403,0|HGLibB_30361,0
SERPINE3	732	183	4	HGLibB_43530,89|HGLibB_43529,137|HGLibB_43531,187|HGLibA_43584,319|HGLibA_43582,0|HGLibA_43583,0
PRODH2	732	183	4	HGLibA_38662,406|HGLibA_38663,86|HGLibB_38614,1|HGLibA_38661,239|HGLibB_38612,0|HGLibB_38613,0
GPA33	732	183	4	HGLibB_19688,323|HGLibB_19690,191|HGLibA_19718,45|HGLibB_19689,173|HGLibA_19716,0|HGLibA_19717,0
TDRD1	732	183	4	HGLibA_48897,481|HGLibA_48896,50|HGLibB_48836,155|HGLibB_48838,46|HGLibB_48837,0|HGLibA_48895,0
KRT80	732	183	4	HGLibA_25556,283|HGLibB_25518,130|HGLibA_25555,73|HGLibA_25554,246|HGLibB_25519,0|HGLibB_25520,0
ACTBL2	731	182.75	4	HGLibA_00605,173|HGLibB_00605,90|HGLibB_00604,221|HGLibB_00603,247|HGLibA_00604,0|HGLibA_00606,0
SLC43A1	731	182.75	4	HGLibB_45095,175|HGLibA_45149,159|HGLibB_45094,315|HGLibB_45096,82|HGLibA_45148,0|HGLibA_45147,0
C15orf56	729	182.25	4	HGLibA_05416,90|HGLibB_05413,335|HGLibB_05412,224|HGLibA_05417,80|HGLibA_05418,0|HGLibB_05414,0
TAS2R19	727	181.75	4	HGLibA_48377,104|HGLibB_48320,237|HGLibB_48319,329|HGLibB_48318,57|HGLibA_48378,0|HGLibA_48379,0
ALPK3	726	181.5	4	HGLibB_01704,96|HGLibA_01705,162|HGLibA_01707,275|HGLibB_01705,193|HGLibB_01703,0|HGLibA_01706,0
METTL1	725	181.25	4	HGLibB_28901,155|HGLibB_28903,47|HGLibA_28942,419|HGLibB_28902,104|HGLibA_28943,0|HGLibA_28944,0
TMPRSS11A	723	180.75	4	HGLibB_50552,186|HGLibB_50553,234|HGLibB_50551,119|HGLibA_50612,184|HGLibA_50613,0|HGLibA_50611,0
ZSCAN21	719	179.75	4	HGLibB_56935,323|HGLibB_56933,92|HGLibA_57001,233|HGLibB_56934,71|HGLibA_57000,0|HGLibA_57002,0
KIAA1191	719	179.75	4	HGLibB_24673,476|HGLibA_24706,84|HGLibA_24707,65|HGLibB_24671,94|HGLibA_24705,0|HGLibB_24672,0
SEMA4D	713	178.25	4	HGLibB_43295,76|HGLibB_43297,99|HGLibA_43350,147|HGLibB_43296,391|HGLibA_43349,0|HGLibA_43348,0
NRAS	713	178.25	4	HGLibA_32649,192|HGLibA_32650,165|HGLibB_32606,228|HGLibB_32605,128|HGLibA_32648,0|HGLibB_32604,0
C2orf42	711	177.75	4	HGLibB_06120,95|HGLibB_06122,53|HGLibB_06121,467|HGLibA_06124,96|HGLibA_06126,0|HGLibA_06125,0
TRPV6	710	177.5	4	HGLibB_51732,456|HGLibB_51733,82|HGLibA_51796,1|HGLibB_51731,171|HGLibA_51797,0|HGLibA_51798,0
OR4K1	709	177.25	4	HGLibA_34016,102|HGLibB_33970,166|HGLibB_33972,365|HGLibA_34015,76|HGLibA_34017,0|HGLibB_33971,0
TSFM	709	177.25	4	HGLibA_51841,198|HGLibB_51775,95|HGLibB_51777,331|HGLibB_51776,85|HGLibA_51840,0|HGLibA_51842,0
SERBP1	708	177	4	HGLibA_43467,321|HGLibA_43466,80|HGLibB_43414,90|HGLibB_43413,217|HGLibA_43465,0|HGLibB_43412,0
CBX3	707	176.75	4	HGLibB_07445,78|HGLibA_07450,452|HGLibA_07452,81|HGLibA_07451,96|HGLibB_07446,0|HGLibB_07444,0
MRPL47	705	176.25	4	HGLibB_29958,89|HGLibB_29959,188|HGLibB_29957,177|HGLibA_29999,251|HGLibA_29998,0|HGLibA_30000,0
GFRA4	703	175.75	4	HGLibB_18948,119|HGLibB_18949,380|HGLibB_18950,69|HGLibA_18973,135|HGLibA_18975,0|HGLibA_18974,0
PORCN	702	175.5	4	HGLibA_37709,139|HGLibB_37658,142|HGLibA_37708,341|HGLibB_37659,80|HGLibA_37707,0|HGLibB_37660,0
SRRD	699	174.75	4	HGLibA_47043,41|HGLibB_46985,138|HGLibA_47041,434|HGLibB_46986,86|HGLibB_46984,0|HGLibA_47042,0
TSPAN32	698	174.5	4	HGLibB_51865,162|HGLibA_51932,78|HGLibA_51931,281|HGLibB_51866,177|HGLibB_51867,0|HGLibA_51930,0
SLC5A5	697	174.25	4	HGLibB_45221,251|HGLibA_45273,87|HGLibB_45220,279|HGLibA_45275,80|HGLibB_45222,0|HGLibA_45274,0
OR10G4	696	174	4	HGLibA_33494,134|HGLibA_33495,93|HGLibB_33450,284|HGLibB_33448,185|HGLibB_33449,0|HGLibA_33493,0
CD99_X	695	173.75	4	HGLibA_08489,64|HGLibA_08488,96|HGLibB_08483,233|HGLibA_08490,302|HGLibB_08481,0|HGLibB_08482,0
GNB2	694	173.5	4	HGLibB_19464,118|HGLibB_19463,139|HGLibA_19491,268|HGLibA_19489,169|HGLibB_19465,0|HGLibA_19490,0
KLHDC1	692	173	4	HGLibB_25056,287|HGLibA_25091,57|HGLibB_25055,1|HGLibB_25054,347|HGLibA_25090,0|HGLibA_25089,0
NAGLU	689	172.25	4	HGLibA_31068,157|HGLibA_31070,155|HGLibB_31026,295|HGLibA_31069,82|HGLibB_31027,0|HGLibB_31028,0
PIGP	688	172	4	HGLibA_36577,483|HGLibB_36530,71|HGLibB_36528,53|HGLibB_36529,81|HGLibA_36576,0|HGLibA_36575,0
PPOX	685	171.25	4	HGLibA_38002,68|HGLibA_38003,54|HGLibB_37952,253|HGLibB_37954,310|HGLibB_37953,0|HGLibA_38001,0
AFF3	685	171.25	4	HGLibA_01112,251|HGLibB_01109,172|HGLibA_01111,111|HGLibB_01110,151|HGLibA_01113,0|HGLibB_01111,0
IFT20	685	171.25	4	HGLibA_22753,39|HGLibA_22752,311|HGLibB_22721,82|HGLibB_22720,253|HGLibB_22722,0|HGLibA_22751,0
NTNG2	684	171	4	HGLibA_32867,325|HGLibB_32825,79|HGLibA_32868,84|HGLibB_32824,196|HGLibB_32823,0|HGLibA_32869,0
BTN2A2	684	171	4	HGLibB_04961,270|HGLibB_04962,249|HGLibA_04966,84|HGLibA_04964,81|HGLibA_04965,0|HGLibB_04963,0
AKR1C4	683	170.75	4	HGLibB_01488,256|HGLibA_01491,136|HGLibB_01487,249|HGLibB_01489,42|HGLibA_01489,0|HGLibA_01490,0
SAMSN1	681	170.25	4	HGLibA_42711,255|HGLibB_42657,244|HGLibB_42656,77|HGLibA_42709,105|HGLibB_42658,0|HGLibA_42710,0
QKI	679	169.75	4	HGLibB_39672,275|HGLibA_39723,174|HGLibA_39725,78|HGLibA_39724,152|HGLibB_39674,0|HGLibB_39673,0
ZNF830	677	169.25	4	HGLibA_56834,173|HGLibB_56767,86|HGLibA_56833,263|HGLibA_56832,155|HGLibB_56766,0|HGLibB_56765,0
CLEC3A	675	168.75	4	HGLibA_09972,95|HGLibB_09965,71|HGLibA_09974,352|HGLibB_09963,157|HGLibA_09973,0|HGLibB_09964,0
CLCN1	673	168.25	4	HGLibA_09821,85|HGLibB_09811,58|HGLibA_09820,105|HGLibA_09819,425|HGLibB_09812,0|HGLibB_09810,0
MPP6	672	168	4	HGLibA_29761,110|HGLibB_29721,104|HGLibB_29722,368|HGLibA_29762,90|HGLibB_29720,0|HGLibA_29763,0
ZNF512	672	168	4	HGLibA_56132,75|HGLibB_56063,408|HGLibB_56065,62|HGLibB_56064,127|HGLibA_56130,0|HGLibA_56131,0
PXMP4	669	167.25	4	HGLibB_39611,386|HGLibB_39609,77|HGLibA_39661,121|HGLibB_39610,85|HGLibA_39662,0|HGLibA_39660,0
SIRPB2	669	167.25	4	HGLibA_44206,94|HGLibA_44207,198|HGLibB_44153,108|HGLibB_44155,269|HGLibB_44154,0|HGLibA_44208,0
NIPAL3	667	166.75	4	HGLibB_31920,318|HGLibB_31918,90|HGLibA_31963,81|HGLibB_31919,178|HGLibA_31962,0|HGLibA_31961,0
TRIM25	667	166.75	4	HGLibB_51376,272|HGLibA_51440,36|HGLibA_51442,88|HGLibB_51378,271|HGLibA_51441,0|HGLibB_51377,0
KCND1	666	166.5	4	HGLibB_24139,149|HGLibB_24141,170|HGLibA_24175,140|HGLibA_24174,207|HGLibA_24173,0|HGLibB_24140,0
IGFBP7	666	166.5	4	HGLibB_22801,68|HGLibB_22803,55|HGLibA_22832,367|HGLibB_22802,176|HGLibA_22833,0|HGLibA_22834,0
ITPRIPL2	665	166.25	4	HGLibA_23867,384|HGLibA_23869,53|HGLibB_23833,127|HGLibA_23868,101|HGLibB_23835,0|HGLibB_23834,0
DIAPH1	663	165.75	4	HGLibA_13217,172|HGLibB_13199,191|HGLibB_13200,140|HGLibA_13216,160|HGLibB_13198,0|HGLibA_13218,0
SASH3	656	164	4	HGLibB_42710,55|HGLibA_42765,346|HGLibB_42711,163|HGLibA_42764,92|HGLibA_42763,0|HGLibB_42712,0
RALYL	648	162	4	HGLibB_40127,217|HGLibA_40177,74|HGLibB_40125,223|HGLibB_40126,134|HGLibA_40178,0|HGLibA_40176,0
SPATA7	648	162	4	HGLibA_46528,127|HGLibA_46527,49|HGLibB_46473,139|HGLibB_46471,333|HGLibB_46472,0|HGLibA_46529,0
KLRC4	643	160.75	4	HGLibB_25259,76|HGLibB_25258,383|HGLibB_25260,80|HGLibA_25293,104|HGLibA_25294,0|HGLibA_25295,0
SREBF1	643	160.75	4	HGLibB_46892,151|HGLibB_46893,186|HGLibB_46891,75|HGLibA_46950,231|HGLibA_46948,0|HGLibA_46949,0
TAOK1	642	160.5	4	HGLibA_48307,157|HGLibA_48305,194|HGLibB_48247,155|HGLibB_48246,136|HGLibA_48306,0|HGLibB_48248,0
CD3E	642	160.5	4	HGLibA_08373,163|HGLibB_08365,385|HGLibB_08364,92|HGLibA_08372,2|HGLibA_08371,0|HGLibB_08366,0
ALKBH4	641	160.25	4	HGLibB_01652,162|HGLibB_01654,137|HGLibA_01655,254|HGLibA_01656,88|HGLibA_01654,0|HGLibB_01653,0
ZSCAN18	639	159.75	4	HGLibA_56993,261|HGLibA_56991,115|HGLibB_56926,84|HGLibB_56925,179|HGLibA_56992,0|HGLibB_56924,0
ZNF529	638	159.5	4	HGLibB_56105,177|HGLibB_56106,221|HGLibA_56174,92|HGLibB_56107,148|HGLibA_56172,0|HGLibA_56173,0
TRNP1	637	159.25	4	HGLibA_51709,195|HGLibB_51645,229|HGLibB_51644,86|HGLibB_51646,127|HGLibA_51710,0|HGLibA_51711,0
TTC39A	636	159	4	HGLibA_52133,188|HGLibB_52067,156|HGLibB_52066,35|HGLibB_52068,257|HGLibA_52132,0|HGLibA_52131,0
DNAAF2	636	159	4	HGLibA_13463,306|HGLibB_13444,113|HGLibB_13442,216|HGLibB_13443,1|HGLibA_13462,0|HGLibA_13461,0
ZNF444	632	158	4	HGLibA_56015,84|HGLibB_55946,91|HGLibA_56013,297|HGLibB_55947,160|HGLibB_55948,0|HGLibA_56014,0
NRM	631	157.75	4	HGLibA_32705,178|HGLibB_32661,150|HGLibB_32662,228|HGLibA_32706,75|HGLibB_32663,0|HGLibA_32707,0
NDUFV3	630	157.5	4	HGLibB_31533,28|HGLibA_31576,451|HGLibA_31574,150|HGLibA_31575,1|HGLibB_31534,0|HGLibB_31532,0
MT1M	629	157.25	4	HGLibB_30253,391|HGLibA_30296,118|HGLibA_30295,76|HGLibB_30254,44|HGLibA_30294,0
YEATS4	629	157.25	4	HGLibA_54659,199|HGLibB_54590,285|HGLibB_54592,89|HGLibA_54658,56|HGLibB_54591,0|HGLibA_54657,0
PSTPIP2	628	157	4	HGLibB_39191,37|HGLibB_39192,107|HGLibA_39242,192|HGLibB_39193,292|HGLibA_39240,0|HGLibA_39241,0
FBXO42	626	156.5	4	HGLibB_17077,95|HGLibA_17098,345|HGLibA_17100,98|HGLibA_17099,88|HGLibB_17076,0|HGLibB_17075,0
ILKAP	621	155.25	4	HGLibA_23223,303|HGLibA_23222,161|HGLibB_23192,75|HGLibB_23190,82|HGLibB_23191,0|HGLibA_23224,0
AGFG1	618	154.5	4	HGLibA_01185,65|HGLibB_01183,160|HGLibB_01182,121|HGLibB_01181,272|HGLibA_01184,0|HGLibA_01183,0
AK1	617	154.25	4	HGLibA_01375,93|HGLibA_01376,120|HGLibB_01375,66|HGLibB_01374,338|HGLibB_01373,0|HGLibA_01377,0
DOCK9	614	153.5	4	HGLibA_13762,262|HGLibB_13739,166|HGLibB_13741,185|HGLibB_13740,1|HGLibA_13760,0|HGLibA_13761,0
FAM153A	614	153.5	4	HGLibB_16146,246|HGLibB_16147,140|HGLibA_16167,98|HGLibA_16169,130|HGLibB_16145,0|HGLibA_16168,0
FLVCR1	613	153.25	4	HGLibA_17675,236|HGLibB_17652,89|HGLibB_17651,116|HGLibA_17674,172|HGLibB_17653,0|HGLibA_17676,0
UHRF1BP1L	613	153.25	4	HGLibB_52886,216|HGLibB_52887,38|HGLibB_52885,261|HGLibA_52950,98|HGLibA_52951,0|HGLibA_52952,0
ARSG	613	153.25	4	HGLibB_03142,301|HGLibB_03140,72|HGLibA_03142,76|HGLibB_03141,164|HGLibA_03144,0|HGLibA_03143,0
LAMA2	612	153	4	HGLibB_25906,374|HGLibB_25908,144|HGLibB_25907,90|HGLibA_25944,4|HGLibA_25945,0|HGLibA_25943,0
TDRD3	612	153	4	HGLibB_48845,131|HGLibB_48846,271|HGLibB_48847,49|HGLibA_48906,161|HGLibA_48905,0|HGLibA_48904,0
NMRAL1	612	153	4	HGLibA_32193,210|HGLibA_32194,243|HGLibA_32192,80|HGLibB_32150,79|HGLibB_32151,0|HGLibB_32149,0
DCBLD2	611	152.75	4	HGLibB_12459,317|HGLibB_12458,84|HGLibA_12471,104|HGLibA_12472,106|HGLibA_12473,0|HGLibB_12457,0
SLC38A10	610	152.5	4	HGLibA_45057,63|HGLibB_45005,107|HGLibA_45058,264|HGLibB_45006,176|HGLibA_45059,0|HGLibB_45004,0
TMEM61	610	152.5	4	HGLibA_50469,116|HGLibA_50468,252|HGLibA_50467,99|HGLibB_50409,143|HGLibB_50407,0|HGLibB_50408,0
UACA	608	152	4	HGLibA_52504,93|HGLibA_52505,63|HGLibB_52438,108|HGLibB_52439,344|HGLibB_52440,0|HGLibA_52503,0
SYNDIG1L	608	152	4	HGLibB_47913,237|HGLibB_47915,202|HGLibB_47914,103|HGLibA_47972,66|HGLibA_47974,0|HGLibA_47973,0
PDE4B	605	151.25	4	HGLibA_35789,83|HGLibB_35743,86|HGLibB_35744,255|HGLibB_35742,181|HGLibA_35790,0|HGLibA_35791,0
SLC24A1	604	151	4	HGLibB_44562,72|HGLibB_44563,296|HGLibA_44616,48|HGLibB_44561,188|HGLibA_44615,0|HGLibA_44614,0
MXD1	604	151	4	HGLibB_30568,85|HGLibA_30609,86|HGLibA_30610,162|HGLibB_30569,271|HGLibA_30611,0|HGLibB_30567,0
ITGAX	601	150.25	4	HGLibB_23733,90|HGLibB_23734,136|HGLibA_23765,232|HGLibB_23732,143|HGLibA_23766,0|HGLibA_23767,0
ENTHD1	599	149.75	4	HGLibB_15169,81|HGLibB_15170,174|HGLibA_15190,257|HGLibA_15192,87|HGLibA_15191,0|HGLibB_15168,0
XDH	599	149.75	4	HGLibA_54501,171|HGLibB_54436,83|HGLibA_54502,262|HGLibB_54434,83|HGLibA_54503,0|HGLibB_54435,0
PLXDC1	598	149.5	4	HGLibB_37204,113|HGLibA_37251,156|HGLibB_37202,83|HGLibB_37203,246|HGLibA_37253,0|HGLibA_37252,0
RGL4	598	149.5	4	HGLibB_40958,325|HGLibA_41010,115|HGLibA_41009,74|HGLibB_40959,84|HGLibB_40960,0|HGLibA_41011,0
PCGF3	598	149.5	4	HGLibB_35551,195|HGLibA_35599,102|HGLibB_35552,230|HGLibB_35550,71|HGLibA_35598,0|HGLibA_35597,0
TEX29	596	149	4	HGLibB_49033,153|HGLibA_49090,100|HGLibB_49032,172|HGLibA_49092,171|HGLibA_49091,0|HGLibB_49031,0
GJD4	596	149	4	HGLibB_19169,187|HGLibA_19193,189|HGLibB_19168,157|HGLibA_19194,63|HGLibA_19192,0|HGLibB_19167,0
WLS	594	148.5	4	HGLibA_54332,168|HGLibB_54266,256|HGLibB_54264,94|HGLibA_54330,76|HGLibA_54331,0|HGLibB_54265,0
SOX2	592	148	4	HGLibB_46196,84|HGLibB_46197,74|HGLibA_46253,82|HGLibB_46195,352|HGLibA_46252,0|HGLibA_46251,0
CSN1S1	591	147.75	4	HGLibA_11371,52|HGLibB_11359,158|HGLibA_11373,300|HGLibB_11361,81|HGLibA_11372,0|HGLibB_11360,0
PRODH	586	146.5	4	HGLibB_38611,237|HGLibA_38658,82|HGLibB_38609,91|HGLibA_38660,176|HGLibB_38610,0|HGLibA_38659,0
LIN54	585	146.25	4	HGLibA_26570,93|HGLibA_26571,105|HGLibB_26533,302|HGLibB_26532,85|HGLibA_26569,0|HGLibB_26534,0
APOE	583	145.75	4	HGLibB_02515,195|HGLibA_02517,97|HGLibB_02516,95|HGLibA_02519,196|HGLibA_02518,0|HGLibB_02517,0
MAP4K3	583	145.75	4	HGLibA_28216,193|HGLibA_28217,285|HGLibB_28177,2|HGLibA_28218,103|HGLibB_28176,0|HGLibB_28175,0
ULBP3	583	145.75	4	HGLibB_52901,185|HGLibB_52902,86|HGLibA_52967,212|HGLibA_52966,100|HGLibB_52900,0|HGLibA_52965,0
PODNL1	582	145.5	4	HGLibB_37408,291|HGLibB_37407,131|HGLibA_37455,91|HGLibA_37457,69|HGLibA_37456,0|HGLibB_37406,0
SPICE1	582	145.5	4	HGLibA_46661,193|HGLibB_46605,200|HGLibA_46662,110|HGLibB_46603,79|HGLibB_46604,0|HGLibA_46660,0
TREX1	573	143.25	4	HGLibB_51307,442|HGLibA_51372,1|HGLibB_51308,113|HGLibA_51371,17|HGLibB_51309,0|HGLibA_51373,0
CASP3	573	143.25	4	HGLibA_07309,87|HGLibB_07304,117|HGLibB_07303,263|HGLibB_07305,106|HGLibA_07311,0|HGLibA_07310,0
ETS2	571	142.75	4	HGLibA_15644,223|HGLibB_15623,100|HGLibB_15621,134|HGLibB_15622,114|HGLibA_15645,0|HGLibA_15643,0
LOC100129083	568	142	4	HGLibB_26715,181|HGLibB_26716,218|HGLibA_26753,65|HGLibA_26752,104|HGLibA_26754,0|HGLibB_26714,0
SLC37A4	568	142	4	HGLibB_44998,301|HGLibB_44999,85|HGLibA_45051,97|HGLibA_45052,85|HGLibB_45000,0|HGLibA_45053,0
GPR123	565	141.25	4	HGLibA_19873,264|HGLibB_19845,80|HGLibA_19874,44|HGLibB_19844,177|HGLibB_19846,0|HGLibA_19872,0
MYO10	565	141.25	4	HGLibA_30803,37|HGLibB_30761,90|HGLibB_30759,78|HGLibB_30760,360|HGLibA_30802,0|HGLibA_30801,0
GPX2	561	140.25	4	HGLibB_20144,79|HGLibB_20145,337|HGLibA_20172,51|HGLibB_20146,94|HGLibA_20173,0|HGLibA_20174,0
GRM6	560	140	4	HGLibB_20327,89|HGLibA_20357,139|HGLibB_20328,235|HGLibB_20329,97|HGLibA_20356,0|HGLibA_20355,0
FAM132A	560	140	4	HGLibB_16092,97|HGLibB_16091,61|HGLibA_16114,315|HGLibB_16093,87|HGLibA_16113,0|HGLibA_16115,0
C16orf58	559	139.75	4	HGLibA_05463,66|HGLibB_05459,54|HGLibB_05457,379|HGLibA_05462,60|HGLibB_05458,0|HGLibA_05461,0
MTSS1	558	139.5	4	HGLibA_30495,180|HGLibA_30496,77|HGLibB_30455,300|HGLibB_30453,1|HGLibB_30454,0|HGLibA_30497,0
QTRTD1	558	139.5	4	HGLibB_39711,308|HGLibB_39712,82|HGLibA_39764,85|HGLibA_39763,83|HGLibA_39762,0|HGLibB_39713,0
OR2T29	558	139.5	4	HGLibB_33825,82|HGLibA_33870,14|HGLibB_33823,174|HGLibB_33824,288|HGLibA_33869,0|HGLibA_33868,0
LDOC1L	558	139.5	4	HGLibA_26259,89|HGLibB_26222,94|HGLibA_26260,274|HGLibB_26221,101|HGLibA_26258,0|HGLibB_26223,0
CFL2	557	139.25	4	HGLibB_09276,75|HGLibA_09285,78|HGLibB_09275,339|HGLibB_09277,65|HGLibA_09284,0|HGLibA_09283,0
VAV1	557	139.25	4	HGLibA_53548,107|HGLibB_53481,1|HGLibB_53483,85|HGLibA_53547,364|HGLibB_53482,0|HGLibA_53549,0
FAM120C	557	139.25	4	HGLibB_16042,151|HGLibB_16041,152|HGLibB_16040,182|HGLibA_16062,72|HGLibA_16064,0|HGLibA_16063,0
AMOTL1	557	139.25	4	HGLibA_01818,205|HGLibB_01814,167|HGLibB_01815,109|HGLibA_01817,76|HGLibB_01816,0|HGLibA_01816,0
PKDCC	557	139.25	4	HGLibA_36808,105|HGLibB_36759,203|HGLibB_36760,91|HGLibA_36806,158|HGLibB_36761,0|HGLibA_36807,0
ACSS2	555	138.75	4	HGLibA_00591,209|HGLibA_00589,189|HGLibA_00590,78|HGLibB_00590,79|HGLibB_00588,0|HGLibB_00589,0
OR4A47	555	138.75	4	HGLibB_33883,219|HGLibA_33929,166|HGLibB_33885,88|HGLibB_33884,82|HGLibA_33928,0|HGLibA_33930,0
MLL5	554	138.5	4	HGLibA_29404,106|HGLibA_29406,84|HGLibB_29363,76|HGLibB_29365,288|HGLibA_29405,0|HGLibB_29364,0
RHEB	554	138.5	4	HGLibA_41153,1|HGLibA_41155,178|HGLibB_41103,234|HGLibB_41102,141|HGLibA_41154,0|HGLibB_41104,0
SLIRP	550	137.5	4	HGLibB_45449,77|HGLibA_45502,251|HGLibB_45450,136|HGLibB_45448,86|HGLibA_45503,0|HGLibA_45501,0
OR4A5	550	137.5	4	HGLibB_33886,260|HGLibA_33933,160|HGLibB_33888,44|HGLibB_33887,86|HGLibA_33931,0|HGLibA_33932,0
RAI2	546	136.5	4	HGLibB_40094,38|HGLibB_40093,153|HGLibB_40092,272|HGLibA_40145,83|HGLibA_40143,0|HGLibA_40144,0
GOLGA6L1	546	136.5	4	HGLibA_19619,95|HGLibB_19593,50|HGLibB_19592,317|HGLibB_19591,84|HGLibA_19620,0|HGLibA_19618,0
ZNF566	545	136.25	4	HGLibB_56193,100|HGLibA_56261,217|HGLibB_56192,94|HGLibA_56259,134|HGLibA_56260,0|HGLibB_56194,0
FRZB	543	135.75	4	HGLibB_18035,287|HGLibB_18034,125|HGLibA_18059,84|HGLibB_18036,47|HGLibA_18058,0|HGLibA_18060,0
IL7	543	135.75	4	HGLibB_23160,75|HGLibB_23158,218|HGLibA_23191,98|HGLibA_23189,152|HGLibB_23159,0|HGLibA_23190,0
ABLIM1	543	135.75	4	HGLibA_00307,134|HGLibB_00307,81|HGLibB_00309,107|HGLibA_00309,221|HGLibB_00308,0|HGLibA_00308,0
DDX11	543	135.75	4	HGLibA_12653,38|HGLibA_12655,200|HGLibB_12641,42|HGLibB_12639,263|HGLibA_12654,0|HGLibB_12640,0
ZNF345	541	135.25	4	HGLibB_55780,79|HGLibB_55779,366|HGLibA_55846,95|HGLibB_55778,1|HGLibA_55847,0|HGLibA_55845,0
TRAPPC1	539	134.75	4	HGLibA_51296,44|HGLibA_51298,90|HGLibB_51235,308|HGLibB_51233,97|HGLibA_51297,0|HGLibB_51234,0
ZNF597	539	134.75	4	HGLibB_56287,83|HGLibB_56285,268|HGLibB_56286,90|HGLibA_56352,98|HGLibA_56353,0|HGLibA_56354,0
COL1A2	537	134.25	4	HGLibB_10522,257|HGLibA_10532,44|HGLibA_10534,60|HGLibA_10533,176|HGLibB_10521,0|HGLibB_10523,0
GLRA3	537	134.25	4	HGLibA_19304,78|HGLibB_19279,213|HGLibA_19305,133|HGLibB_19280,113|HGLibA_19303,0|HGLibB_19278,0
ZNF594	536	134	4	HGLibA_56343,75|HGLibB_56277,173|HGLibB_56276,205|HGLibB_56278,83|HGLibA_56345,0|HGLibA_56344,0
SULT1A3	532	133	4	HGLibB_47679,72|HGLibB_47680,232|HGLibA_47736,90|HGLibA_47738,138|HGLibB_47681,0
FZR1	531	132.75	4	HGLibA_18290,79|HGLibB_18266,49|HGLibB_18265,85|HGLibA_18291,318|HGLibA_18289,0|HGLibB_18264,0
ATG2B	530	132.5	4	HGLibB_03479,186|HGLibA_03483,62|HGLibA_03481,93|HGLibA_03482,189|HGLibB_03480,0|HGLibB_03481,0
CYP4A22	529	132.25	4	HGLibB_12161,181|HGLibB_12162,178|HGLibA_12176,67|HGLibB_12163,103|HGLibA_12174,0|HGLibA_12175,0
CALML4	526	131.5	4	HGLibB_07030,134|HGLibA_07035,44|HGLibB_07028,279|HGLibA_07033,69|HGLibA_07034,0|HGLibB_07029,0
ABHD12	525	131.25	4	HGLibB_00238,97|HGLibA_00238,75|HGLibB_00239,265|HGLibA_00239,88|HGLibA_00240,0|HGLibB_00240,0
YAE1D1	525	131.25	4	HGLibA_54625,92|HGLibA_54626,91|HGLibB_54559,243|HGLibB_54558,99|HGLibB_54557,0|HGLibA_54624,0
VPS33B	524	131	4	HGLibA_53768,181|HGLibA_53766,74|HGLibB_53700,89|HGLibA_53767,180|HGLibB_53702,0|HGLibB_53701,0
ANGPTL1	523	130.75	4	HGLibB_01907,314|HGLibB_01909,137|HGLibA_01909,34|HGLibA_01911,38|HGLibB_01908,0|HGLibA_01910,0
MANSC1	522	130.5	4	HGLibA_28100,87|HGLibB_28058,163|HGLibB_28059,81|HGLibA_28099,191|HGLibB_28060,0|HGLibA_28101,0
CMTM8	521	130.25	4	HGLibB_10218,104|HGLibA_10229,125|HGLibB_10219,198|HGLibA_10231,94|HGLibA_10230,0|HGLibB_10220,0
SUCLA2	520	130	4	HGLibA_47697,132|HGLibA_47695,70|HGLibB_47639,231|HGLibA_47696,87|HGLibB_47640,0|HGLibB_47638,0
UHRF1BP1	520	130	4	HGLibB_52884,296|HGLibA_52949,112|HGLibB_52882,1|HGLibA_52947,111|HGLibB_52883,0|HGLibA_52948,0
ADH1B	520	130	4	HGLibB_00952,84|HGLibA_00954,59|HGLibB_00950,133|HGLibA_00953,244|HGLibA_00952,0|HGLibB_00951,0
MEIS3	518	129.5	4	HGLibB_28835,152|HGLibA_28877,96|HGLibA_28878,176|HGLibB_28836,94|HGLibA_28876,0|HGLibB_28837,0
IL22RA2	518	129.5	4	HGLibB_23062,102|HGLibB_23064,99|HGLibA_23094,97|HGLibB_23063,220|HGLibA_23093,0|HGLibA_23095,0
WIBG	516	129	4	HGLibB_54232,166|HGLibA_54298,100|HGLibB_54231,163|HGLibA_54297,87|HGLibB_54233,0|HGLibA_54299,0
ZNF367	514	128.5	4	HGLibA_55882,104|HGLibB_55816,162|HGLibA_55883,215|HGLibB_55814,33|HGLibB_55815,0|HGLibA_55881,0
SPATS2L	514	128.5	4	HGLibB_46492,98|HGLibA_46549,160|HGLibB_46493,58|HGLibB_46494,198|HGLibA_46550,0|HGLibA_46548,0
CDHR3	513	128.25	4	HGLibB_08697,113|HGLibA_08705,171|HGLibB_08698,155|HGLibB_08696,74|HGLibA_08704,0|HGLibA_08703,0
SUPT20HL2	513	128.25	4	HGLibA_47811,201|HGLibA_47810,77|HGLibA_47812,86|HGLibB_47755,149|HGLibB_47754,0|HGLibB_47753,0
KCNV2	512	128	4	HGLibB_24372,73|HGLibA_24404,82|HGLibB_24371,112|HGLibB_24370,245|HGLibA_24405,0|HGLibA_24406,0
C14orf142	508	127	4	HGLibA_05326,253|HGLibB_05322,78|HGLibB_05323,87|HGLibB_05324,90|HGLibA_05328,0|HGLibA_05327,0
GLRA2	506	126.5	4	HGLibA_19302,30|HGLibA_19300,88|HGLibB_19276,93|HGLibB_19277,295|HGLibB_19275,0|HGLibA_19301,0
AASDH	505	126.25	4	HGLibB_00078,87|HGLibA_00076,262|HGLibA_00077,81|HGLibB_00076,75|HGLibB_00077,0|HGLibA_00078,0
IFT74	505	126.25	4	HGLibA_22771,129|HGLibB_22738,107|HGLibA_22770,156|HGLibB_22740,113|HGLibA_22769,0|HGLibB_22739,0
RAD54L	504	126	4	HGLibB_40051,190|HGLibB_40050,124|HGLibB_40052,1|HGLibA_40102,189|HGLibA_40101,0|HGLibA_40103,0
ACOT2	503	125.75	4	HGLibB_00479,375|HGLibB_00480,85|HGLibB_00478,42|HGLibA_00480,1|HGLibA_00478,0|HGLibA_00479,0
FAM20A	502	125.5	4	HGLibB_16423,82|HGLibA_16443,68|HGLibA_16445,265|HGLibB_16422,87|HGLibA_16444,0|HGLibB_16421,0
ATF7IP	502	125.5	4	HGLibA_03454,282|HGLibB_03454,71|HGLibB_03453,48|HGLibB_03452,101|HGLibA_03456,0|HGLibA_03455,0
FAM160A2	502	125.5	4	HGLibB_16186,234|HGLibA_16208,131|HGLibA_16206,52|HGLibA_16207,85|HGLibB_16185,0|HGLibB_16184,0
CRTAP	501	125.25	4	HGLibB_11214,209|HGLibB_11212,44|HGLibB_11213,69|HGLibA_11224,179|HGLibA_11226,0|HGLibA_11225,0
GRK5	500	125	4	HGLibA_20332,88|HGLibA_20333,159|HGLibB_20303,167|HGLibB_20304,86|HGLibB_20305,0|HGLibA_20331,0
EIF1B	499	124.75	4	HGLibA_14718,41|HGLibB_14696,304|HGLibB_14695,56|HGLibB_14694,98|HGLibA_14717,0|HGLibA_14716,0
ASPM	499	124.75	4	HGLibB_03358,146|HGLibA_03358,33|HGLibB_03357,74|HGLibA_03360,246|HGLibB_03356,0|HGLibA_03359,0
KLLN	498	124.5	4	HGLibA_25279,224|HGLibA_25280,40|HGLibB_25244,80|HGLibB_25245,154|HGLibA_25278,0|HGLibB_25243,0
CEACAM3	497	124.25	4	HGLibA_08939,71|HGLibA_08937,175|HGLibB_08930,166|HGLibB_08932,85|HGLibA_08938,0|HGLibB_08931,0
KLRF1	496	124	4	HGLibA_25304,145|HGLibB_25267,90|HGLibB_25268,170|HGLibB_25269,91|HGLibA_25303,0|HGLibA_25302,0
44085	496	124	4	HGLibB_43375,79|HGLibB_43374,105|HGLibA_43431,176|HGLibB_43373,136|HGLibA_43430,0|HGLibA_43429,0
C17orf58	493	123.25	4	HGLibA_05549,122|HGLibA_05548,84|HGLibB_05544,191|HGLibB_05545,96|HGLibB_05546,0|HGLibA_05550,0
SLC6A19	493	123.25	4	HGLibB_45264,124|HGLibB_45262,230|HGLibA_45315,42|HGLibB_45263,97|HGLibA_45317,0|HGLibA_45316,0
FOXN1	493	123.25	4	HGLibA_17910,97|HGLibA_17908,170|HGLibB_17887,107|HGLibA_17909,119|HGLibB_17886,0|HGLibB_17885,0
DNAJC5B	493	123.25	4	HGLibB_13608,279|HGLibA_13626,61|HGLibA_13627,77|HGLibB_13607,76|HGLibA_13628,0|HGLibB_13609,0
PGAM5	491	122.75	4	HGLibA_36204,85|HGLibA_36205,113|HGLibA_36203,111|HGLibB_36157,182|HGLibB_36158,0|HGLibB_36156,0
CARNS1	488	122	4	HGLibB_07250,276|HGLibA_07257,72|HGLibA_07256,77|HGLibA_07255,63|HGLibB_07251,0|HGLibB_07249,0
KPNA4	488	122	4	HGLibB_25328,102|HGLibA_25362,94|HGLibB_25327,179|HGLibA_25363,113|HGLibA_25364,0
PI4K2B	487	121.75	4	HGLibB_36448,94|HGLibA_36494,84|HGLibA_36495,223|HGLibB_36447,86|HGLibA_36496,0|HGLibB_36449,0
ONECUT2	486	121.5	4	HGLibA_33395,222|HGLibB_33351,41|HGLibB_33349,86|HGLibA_33394,137|HGLibB_33350,0|HGLibA_33396,0
SLC26A8	486	121.5	4	HGLibB_44755,82|HGLibB_44754,168|HGLibA_44808,79|HGLibA_44806,157|HGLibB_44753,0|HGLibA_44807,0
EBP	485	121.25	4	HGLibB_14352,137|HGLibB_14350,180|HGLibB_14351,67|HGLibA_14372,101|HGLibA_14374,0|HGLibA_14373,0
SFTPC	485	121.25	4	HGLibA_43776,224|HGLibB_43723,78|HGLibA_43774,110|HGLibB_43721,73|HGLibB_43722,0|HGLibA_43775,0
RNASE13	483	120.75	4	HGLibB_41348,177|HGLibB_41347,65|HGLibB_41349,205|HGLibA_41399,36|HGLibA_41401,0|HGLibA_41400,0
UBOX5	482	120.5	4	HGLibB_52660,61|HGLibA_52726,85|HGLibB_52662,161|HGLibB_52661,175|HGLibA_52727,0|HGLibA_52725,0
ALPL	482	120.5	4	HGLibA_01709,97|HGLibB_01707,188|HGLibB_01708,123|HGLibB_01706,74|HGLibA_01708,0|HGLibA_01710,0
JPH3	481	120.25	4	HGLibA_23984,208|HGLibB_23952,77|HGLibA_23985,88|HGLibB_23950,108|HGLibB_23951,0|HGLibA_23986,0
KCNQ5	478	119.5	4	HGLibB_24345,284|HGLibA_24378,107|HGLibA_24377,86|HGLibB_24344,1|HGLibA_24379,0|HGLibB_24343,0
SHPRH	478	119.5	4	HGLibB_44028,74|HGLibB_44029,94|HGLibB_44027,171|HGLibA_44081,139|HGLibA_44082,0|HGLibA_44080,0
TNFSF9	478	119.5	4	HGLibB_50766,233|HGLibB_50767,1|HGLibB_50768,174|HGLibA_50830,70|HGLibA_50828,0|HGLibA_50829,0
ZNF672	478	119.5	4	HGLibB_56439,100|HGLibB_56438,170|HGLibB_56440,69|HGLibA_56505,139|HGLibA_56507,0|HGLibA_56506,0
CHURC1	474	118.5	4	HGLibA_09673,89|HGLibA_09674,86|HGLibB_09665,94|HGLibB_09663,205|HGLibA_09672,0|HGLibB_09664,0
DPEP1	473	118.25	4	HGLibB_13798,317|HGLibB_13796,87|HGLibB_13797,68|HGLibA_13818,1|HGLibA_13819,0|HGLibA_13817,0
FANCE	471	117.75	4	HGLibB_16823,159|HGLibB_16822,1|HGLibA_16845,80|HGLibA_16844,231|HGLibB_16821,0|HGLibA_16846,0
ASB1	470	117.5	4	HGLibB_03201,90|HGLibB_03200,69|HGLibB_03202,157|HGLibA_03202,154|HGLibA_03204,0|HGLibA_03203,0
PPP1R32	469	117.25	4	HGLibA_38087,264|HGLibA_38086,80|HGLibB_38036,1|HGLibB_38037,124|HGLibB_38038,0|HGLibA_38085,0
CXorf21	469	117.25	4	HGLibB_11890,2|HGLibA_11902,317|HGLibB_11889,40|HGLibA_11901,110|HGLibA_11903,0|HGLibB_11891,0
SGMS1	468	117	4	HGLibA_43836,150|HGLibA_43834,148|HGLibA_43835,85|HGLibB_43783,85|HGLibB_43781,0|HGLibB_43782,0
OPTC	468	117	4	HGLibA_33455,80|HGLibA_33454,137|HGLibB_33411,128|HGLibB_33409,123|HGLibB_33410,0|HGLibA_33456,0
INHBE	468	117	4	HGLibB_23277,99|HGLibA_23309,130|HGLibA_23310,65|HGLibA_23311,174|HGLibB_23279,0|HGLibB_23278,0
GATA3	468	117	4	HGLibA_18670,109|HGLibB_18646,72|HGLibA_18671,234|HGLibA_18672,53|HGLibB_18647,0|HGLibB_18645,0
AKAP13	468	117	4	HGLibA_01414,90|HGLibB_01412,203|HGLibB_01414,95|HGLibB_01413,80|HGLibA_01415,0|HGLibA_01416,0
PCDHB12	468	117	4	HGLibB_35431,145|HGLibA_35477,124|HGLibA_35479,79|HGLibB_35430,120|HGLibA_35478,0|HGLibB_35432,0
CHADL	468	117	4	HGLibA_09344,169|HGLibB_09335,40|HGLibA_09345,61|HGLibB_09336,198|HGLibA_09343,0|HGLibB_09337,0
PCBD1	467	116.75	4	HGLibB_35313,258|HGLibA_35362,94|HGLibA_35361,43|HGLibB_35315,72|HGLibA_35360,0|HGLibB_35314,0
LDHC	466	116.5	4	HGLibB_26196,103|HGLibA_26232,151|HGLibA_26233,114|HGLibB_26194,98|HGLibB_26195,0|HGLibA_26231,0
RNF214	466	116.5	4	HGLibB_41574,77|HGLibA_41625,214|HGLibA_41624,92|HGLibB_41572,83|HGLibB_41573,0|HGLibA_41626,0
PCDP1	466	116.5	4	HGLibB_35533,368|HGLibA_35580,1|HGLibB_35534,63|HGLibA_35579,34|HGLibA_35581,0|HGLibB_35532,0
NHEJ1	464	116	4	HGLibB_31844,40|HGLibB_31845,245|HGLibB_31843,97|HGLibA_31886,82|HGLibA_31887,0|HGLibA_31888,0
GPNMB	462	115.5	4	HGLibB_19807,96|HGLibB_19805,82|HGLibA_19834,99|HGLibB_19806,185|HGLibA_19833,0|HGLibA_19835,0
AICDA	462	115.5	4	HGLibA_01325,107|HGLibA_01324,179|HGLibB_01324,77|HGLibB_01322,99|HGLibA_01326,0|HGLibB_01323,0
ICT1	462	115.5	4	HGLibA_22521,70|HGLibB_22489,170|HGLibB_22490,153|HGLibB_22491,69|HGLibA_22520,0|HGLibA_22522,0
PHLPP1	461	115.25	4	HGLibA_36435,175|HGLibB_36388,97|HGLibB_36389,99|HGLibB_36387,90|HGLibA_36436,0|HGLibA_36434,0
C3orf30	460	115	4	HGLibA_06227,140|HGLibB_06224,151|HGLibB_06223,1|HGLibB_06222,168|HGLibA_06226,0|HGLibA_06228,0
ARPC5	460	115	4	HGLibA_03092,73|HGLibB_03090,137|HGLibB_03091,194|HGLibA_03091,56|HGLibA_03093,0|HGLibB_03089,0
AKAP12	458	114.5	4	HGLibB_01410,221|HGLibA_01413,117|HGLibB_01409,2|HGLibB_01411,118|HGLibA_01411,0|HGLibA_01412,0
ARHGAP26	456	114	4	HGLibA_02741,84|HGLibA_02742,78|HGLibA_02740,166|HGLibB_02740,128|HGLibB_02739,0|HGLibB_02738,0
OR2J3	455	113.75	4	HGLibB_33766,185|HGLibB_33768,100|HGLibA_33812,85|HGLibA_33813,85|HGLibB_33767,0|HGLibA_33811,0
EVA1C	455	113.75	4	HGLibA_15676,201|HGLibA_15678,91|HGLibB_15656,86|HGLibB_15655,77|HGLibB_15654,0|HGLibA_15677,0
CTNND1	455	113.75	4	HGLibB_11648,81|HGLibA_11658,149|HGLibA_11660,150|HGLibA_11659,75|HGLibB_11646,0|HGLibB_11647,0
RDH16	451	112.75	4	HGLibB_40696,97|HGLibB_40694,140|HGLibA_40746,144|HGLibA_40745,70|HGLibA_40747,0|HGLibB_40695,0
ZIC5	450	112.5	4	HGLibA_55333,161|HGLibA_55334,87|HGLibB_55266,99|HGLibA_55332,103|HGLibB_55267,0|HGLibB_55265,0
IDH2	450	112.5	4	HGLibB_22511,47|HGLibA_22541,316|HGLibB_22510,1|HGLibB_22512,86|HGLibA_22543,0|HGLibA_22542,0
GNPNAT1	449	112.25	4	HGLibB_19544,85|HGLibA_19572,50|HGLibA_19571,80|HGLibB_19543,234|HGLibB_19545,0|HGLibA_19570,0
CTPS2	449	112.25	4	HGLibB_11658,88|HGLibA_11671,203|HGLibA_11672,64|HGLibB_11659,94|HGLibA_11670,0|HGLibB_11660,0
FAM173B	448	112	4	HGLibB_16256,38|HGLibA_16278,160|HGLibB_16258,153|HGLibA_16280,97|HGLibA_16279,0|HGLibB_16257,0
HBP1	447	111.75	4	HGLibA_20934,94|HGLibB_20906,85|HGLibB_20907,133|HGLibB_20905,135|HGLibA_20933,0|HGLibA_20935,0
GCAT	447	111.75	4	HGLibB_18735,59|HGLibA_18761,67|HGLibB_18736,236|HGLibB_18737,85|HGLibA_18760,0|HGLibA_18762,0
SLC4A11	446	111.5	4	HGLibB_45156,310|HGLibB_45154,1|HGLibA_45209,48|HGLibB_45155,87|HGLibA_45207,0|HGLibA_45208,0
MAGEB16	446	111.5	4	HGLibA_27935,250|HGLibA_27934,3|HGLibB_27894,84|HGLibB_27895,109|HGLibA_27936,0|HGLibB_27893,0
BARHL2	444	111	4	HGLibB_04160,207|HGLibB_04159,89|HGLibA_04162,84|HGLibB_04158,64|HGLibA_04160,0|HGLibA_04161,0
HEXIM1	443	110.75	4	HGLibA_21211,86|HGLibB_21181,141|HGLibB_21183,135|HGLibA_21209,81|HGLibA_21210,0|HGLibB_21182,0
FBXW5	443	110.75	4	HGLibB_17127,194|HGLibA_17150,79|HGLibB_17128,72|HGLibA_17149,98|HGLibA_17151,0|HGLibB_17126,0
RBM5	443	110.75	4	HGLibB_40523,87|HGLibB_40525,80|HGLibA_40575,88|HGLibA_40576,188|HGLibA_40574,0|HGLibB_40524,0
VSX1	443	110.75	4	HGLibA_53876,1|HGLibA_53875,319|HGLibB_53810,42|HGLibB_53808,81|HGLibB_53809,0|HGLibA_53874,0
SERPINB4	442	110.5	4	HGLibB_43500,190|HGLibA_43554,75|HGLibA_43553,86|HGLibB_43501,91|HGLibA_43552,0
BAIAP2L2	441	110.25	4	HGLibA_04127,93|HGLibA_04129,84|HGLibB_04127,84|HGLibB_04126,180|HGLibB_04125,0|HGLibA_04128,0
HDAC7	440	110	4	HGLibA_21021,36|HGLibA_21020,48|HGLibB_20994,208|HGLibB_20992,148|HGLibA_21022,0|HGLibB_20993,0
C20orf27	439	109.75	4	HGLibB_06018,214|HGLibA_06022,77|HGLibB_06019,2|HGLibB_06020,146|HGLibA_06023,0|HGLibA_06024,0
CRYGN	437	109.25	4	HGLibA_11281,91|HGLibB_11271,69|HGLibA_11282,179|HGLibB_11270,98|HGLibA_11283,0|HGLibB_11269,0
PCSK1	436	109	4	HGLibB_35619,154|HGLibB_35621,120|HGLibA_35668,74|HGLibA_35666,88|HGLibA_35667,0|HGLibB_35620,0
ETNPPL	436	109	4	HGLibB_15615,180|HGLibA_15637,77|HGLibB_15616,93|HGLibA_15638,86|HGLibB_15617,0|HGLibA_15639,0
CD28	436	109	4	HGLibA_08325,64|HGLibA_08323,68|HGLibA_08324,2|HGLibB_08316,302|HGLibB_08318,0|HGLibB_08317,0
GABRA3	433	108.25	4	HGLibA_18361,204|HGLibA_18362,74|HGLibB_18338,91|HGLibB_18336,64|HGLibA_18363,0|HGLibB_18337,0
NBEA	433	108.25	4	HGLibB_31165,79|HGLibA_31206,73|HGLibA_31205,199|HGLibA_31207,82|HGLibB_31164,0|HGLibB_31163,0
NAA35	432	108	4	HGLibB_30949,1|HGLibB_30948,143|HGLibA_30991,168|HGLibB_30950,120|HGLibA_30990,0|HGLibA_30992,0
LYPD6B	432	108	4	HGLibB_27691,63|HGLibA_27732,83|HGLibA_27730,83|HGLibA_27731,203|HGLibB_27690,0|HGLibB_27689,0
OR51T1	431	107.75	4	HGLibB_34087,201|HGLibB_34088,68|HGLibA_34133,74|HGLibA_34134,88|HGLibB_34089,0|HGLibA_34132,0
RAD1	430	107.5	4	HGLibB_40002,64|HGLibB_40003,1|HGLibB_40004,302|HGLibA_40055,63|HGLibA_40054,0|HGLibA_40053,0
AMELX	429	107.25	4	HGLibA_01766,89|HGLibB_01763,77|HGLibB_01764,88|HGLibB_01765,175|HGLibA_01767,0|HGLibA_01765,0
FAM167B	429	107.25	4	HGLibA_16243,77|HGLibB_16220,181|HGLibB_16222,78|HGLibB_16221,93|HGLibA_16244,0|HGLibA_16242,0
MFSD4	428	107	4	HGLibB_29062,1|HGLibA_29102,97|HGLibB_29060,133|HGLibB_29061,197|HGLibA_29103,0|HGLibA_29101,0
ZNF791	427	106.75	4	HGLibB_56701,78|HGLibA_56766,51|HGLibA_56767,124|HGLibB_56700,174|HGLibB_56699,0|HGLibA_56768,0
C12orf71	426	106.5	4	HGLibB_05283,82|HGLibA_05288,1|HGLibB_05284,169|HGLibB_05285,174|HGLibA_05287,0|HGLibA_05289,0
IRX6	424	106	4	HGLibB_23609,86|HGLibA_23644,161|HGLibA_23642,100|HGLibA_23643,77|HGLibB_23611,0|HGLibB_23610,0
ZNF311	424	106	4	HGLibB_55713,158|HGLibB_55712,77|HGLibA_55781,117|HGLibA_55779,72|HGLibA_55780,0|HGLibB_55714,0
GNG13	423	105.75	4	HGLibB_19489,88|HGLibB_19490,159|HGLibA_19516,97|HGLibB_19491,79|HGLibA_19518,0|HGLibA_19517,0
GDPD3	423	105.75	4	HGLibB_18872,124|HGLibB_18870,98|HGLibA_18896,89|HGLibB_18871,112|HGLibA_18897,0|HGLibA_18895,0
OSGIN2	421	105.25	4	HGLibA_34691,23|HGLibB_34645,150|HGLibB_34646,92|HGLibB_34644,156|HGLibA_34690,0|HGLibA_34689,0
USO1	421	105.25	4	HGLibA_53188,120|HGLibA_53187,87|HGLibB_53123,132|HGLibB_53122,82|HGLibB_53121,0|HGLibA_53189,0
ALDH1A3	421	105.25	4	HGLibB_01545,189|HGLibA_01548,79|HGLibB_01544,61|HGLibB_01546,92|HGLibA_01546,0|HGLibA_01547,0
PITPNM2	420	105	4	HGLibA_36752,106|HGLibB_36706,121|HGLibB_36707,67|HGLibA_36753,126|HGLibA_36754,0|HGLibB_36705,0
IL1RAP	419	104.75	4	HGLibA_23051,70|HGLibB_23022,65|HGLibB_23021,90|HGLibA_23053,194|HGLibA_23052,0|HGLibB_23020,0
OLR1	418	104.5	4	HGLibB_33332,57|HGLibA_33378,74|HGLibA_33377,190|HGLibB_33331,97|HGLibB_33333,0|HGLibA_33376,0
CLUAP1	416	104	4	HGLibA_10159,78|HGLibB_10147,186|HGLibB_10148,70|HGLibA_10157,82|HGLibA_10158,0|HGLibB_10149,0
ADAM8	416	104	4	HGLibB_00781,225|HGLibA_00783,43|HGLibA_00781,81|HGLibB_00780,67|HGLibB_00779,0|HGLibA_00782,0
GFPT2	415	103.75	4	HGLibB_18937,94|HGLibB_18938,124|HGLibB_18936,191|HGLibA_18963,6|HGLibA_18962,0|HGLibA_18961,0
ITCH	414	103.5	4	HGLibB_23671,33|HGLibA_23702,185|HGLibA_23704,100|HGLibB_23670,96|HGLibB_23669,0|HGLibA_23703,0
MRC1	412	103	4	HGLibA_29816,184|HGLibB_29776,51|HGLibB_29774,88|HGLibA_29817,89|HGLibA_29815,0|HGLibB_29775,0
OC90	411	102.75	4	HGLibA_33238,50|HGLibB_33194,87|HGLibB_33193,91|HGLibB_33192,183|HGLibA_33236,0|HGLibA_33237,0
CNST	410	102.5	4	HGLibA_10382,81|HGLibA_10384,70|HGLibB_10372,75|HGLibA_10383,184|HGLibB_10371,0|HGLibB_10373,0
DOC2B	408	102	4	HGLibB_13709,74|HGLibA_13729,171|HGLibA_13728,88|HGLibA_13727,75|HGLibB_13707,0|HGLibB_13708,0
HCAR2	407	101.75	4	HGLibA_20948,153|HGLibA_20949,93|HGLibB_20922,90|HGLibB_20920,71|HGLibA_20950,0|HGLibB_20921,0
ZNF581	407	101.75	4	HGLibA_56308,155|HGLibB_56242,77|HGLibB_56241,91|HGLibA_56307,84|HGLibA_56309,0|HGLibB_56240,0
PPP1R3A	403	100.75	4	HGLibA_38099,70|HGLibB_38049,215|HGLibA_38098,2|HGLibB_38050,116|HGLibA_38097,0|HGLibB_38048,0
TBCD	403	100.75	4	HGLibA_48590,76|HGLibB_48530,1|HGLibB_48531,29|HGLibA_48589,297|HGLibA_48591,0|HGLibB_48532,0
CHRNA3	403	100.75	4	HGLibA_09572,224|HGLibB_09561,1|HGLibB_09563,93|HGLibA_09570,85|HGLibB_09562,0|HGLibA_09571,0
CDYL2	403	100.75	4	HGLibB_08914,162|HGLibB_08912,80|HGLibA_08920,87|HGLibA_08919,74|HGLibB_08913,0|HGLibA_08921,0
C10orf10	401	100.25	4	HGLibA_05018,94|HGLibB_05017,1|HGLibA_05019,71|HGLibB_05016,235|HGLibA_05020,0|HGLibB_05015,0
ZNF23	401	100.25	4	HGLibB_55567,230|HGLibA_55634,1|HGLibB_55565,82|HGLibB_55566,88|HGLibA_55633,0|HGLibA_55632,0
PDCD5	401	100.25	4	HGLibA_35737,182|HGLibB_35689,97|HGLibA_35736,59|HGLibA_35735,63|HGLibB_35690,0|HGLibB_35688,0
HNF4A	400	100	4	HGLibA_21781,78|HGLibB_21752,209|HGLibA_21780,31|HGLibB_21751,82|HGLibB_21750,0|HGLibA_21779,0
TEX22	400	100	4	HGLibA_49076,185|HGLibA_49077,1|HGLibB_49016,83|HGLibB_49017,131|HGLibB_49018,0|HGLibA_49075,0
RECQL5	400	100	4	HGLibA_40772,101|HGLibB_40722,103|HGLibB_40721,1|HGLibB_40723,195|HGLibA_40774,0|HGLibA_40773,0
ATP9B	399	99.75	4	HGLibB_03792,84|HGLibA_03796,139|HGLibB_03793,85|HGLibA_03794,91|HGLibA_03795,0|HGLibB_03794,0
TIMM8B	399	99.75	4	HGLibB_49467,61|HGLibA_49525,86|HGLibB_49465,164|HGLibA_49527,88|HGLibA_49526,0|HGLibB_49466,0
ZNF114	399	99.75	4	HGLibB_55376,84|HGLibA_55445,99|HGLibB_55377,142|HGLibB_55378,74|HGLibA_55444,0|HGLibA_55443,0
TRABD	397	99.25	4	HGLibB_51164,50|HGLibB_51166,189|HGLibA_51227,91|HGLibB_51165,67|HGLibA_51229,0|HGLibA_51228,0
MFSD5	395	98.75	4	HGLibA_29104,14|HGLibB_29063,1|HGLibB_29065,185|HGLibB_29064,195|HGLibA_29106,0|HGLibA_29105,0
ZC2HC1A	394	98.5	4	HGLibB_54870,95|HGLibA_54936,39|HGLibA_54938,170|HGLibB_54871,90|HGLibA_54937,0|HGLibB_54869,0
BAZ1A	391	97.75	4	HGLibB_04183,85|HGLibA_04184,125|HGLibA_04185,102|HGLibB_04182,79|HGLibA_04186,0|HGLibB_04184,0
ANKH	390	97.5	4	HGLibA_01962,82|HGLibA_01961,42|HGLibB_01960,176|HGLibB_01959,90|HGLibA_01960,0|HGLibB_01958,0
UNKL	390	97.5	4	HGLibB_52986,80|HGLibA_53050,80|HGLibA_53049,73|HGLibB_52985,157|HGLibB_52984,0|HGLibA_53051,0
PKN1	388	97	4	HGLibB_36790,104|HGLibB_36789,160|HGLibA_36838,33|HGLibA_36837,91|HGLibA_36836,0|HGLibB_36791,0
GLI2	388	97	4	HGLibB_19224,211|HGLibB_19226,74|HGLibB_19225,102|HGLibA_19249,1|HGLibA_19250,0|HGLibA_19251,0
CEMP1	386	96.5	4	HGLibA_09031,9|HGLibB_09024,37|HGLibB_09023,149|HGLibB_09025,191|HGLibA_09032,0|HGLibA_09030,0
APOPT1	384	96	4	HGLibA_02558,151|HGLibB_02555,1|HGLibB_02556,84|HGLibB_02554,148|HGLibA_02556,0|HGLibA_02557,0
CALHM2	384	96	4	HGLibB_07012,152|HGLibB_07010,67|HGLibB_07011,70|HGLibA_07017,95|HGLibA_07016,0|HGLibA_07015,0
ESAM	383	95.75	4	HGLibB_15532,79|HGLibB_15533,138|HGLibB_15531,1|HGLibA_15555,165|HGLibA_15553,0|HGLibA_15554,0
DFNA5	383	95.75	4	HGLibB_13008,83|HGLibA_13026,78|HGLibB_13006,221|HGLibA_13025,1|HGLibB_13007,0|HGLibA_13024,0
DDC	380	95	4	HGLibB_12585,61|HGLibB_12587,69|HGLibA_12599,169|HGLibA_12601,81|HGLibB_12586,0|HGLibA_12600,0
MANBAL	380	95	4	HGLibA_28089,104|HGLibB_28046,85|HGLibA_28087,121|HGLibB_28047,70|HGLibA_28088,0|HGLibB_28048,0
USP21	380	95	4	HGLibA_53302,178|HGLibB_53236,82|HGLibA_53301,35|HGLibB_53235,85|HGLibA_53303,0|HGLibB_53237,0
HOXA7	380	95	4	HGLibB_21890,146|HGLibA_21919,191|HGLibA_21920,41|HGLibB_21892,2|HGLibB_21891,0|HGLibA_21921,0
HDAC1	379	94.75	4	HGLibB_20968,47|HGLibB_20969,166|HGLibA_20998,83|HGLibA_20997,83|HGLibB_20970,0|HGLibA_20996,0
HIST1H2AE	379	94.75	4	HGLibB_21359,35|HGLibA_21388,78|HGLibB_21360,82|HGLibB_21358,184|HGLibA_21387,0|HGLibA_21386,0
MCOLN3	379	94.75	4	HGLibB_28601,213|HGLibB_28602,86|HGLibA_28644,30|HGLibB_28603,50|HGLibA_28643,0|HGLibA_28642,0
MYH13	375	93.75	4	HGLibB_30670,32|HGLibB_30671,93|HGLibA_30712,249|HGLibB_30669,1|HGLibA_30713,0|HGLibA_30711,0
MORN2	375	93.75	4	HGLibA_29668,83|HGLibA_29669,115|HGLibB_29629,102|HGLibB_29628,75|HGLibB_29627,0|HGLibA_29670,0
SYTL5	374	93.5	4	HGLibB_48048,147|HGLibB_48049,93|HGLibA_48108,85|HGLibB_48050,49|HGLibA_48107,0|HGLibA_48109,0
UGT2A2	373	93.25	4	HGLibB_52842,86|HGLibB_52840,99|HGLibA_52906,122|HGLibA_52905,66|HGLibB_52841,0
KCNA4	372	93	4	HGLibA_24135,1|HGLibB_24102,188|HGLibA_24136,81|HGLibB_24100,102|HGLibA_24134,0|HGLibB_24101,0
ACMSD	371	92.75	4	HGLibA_00455,79|HGLibA_00454,55|HGLibB_00456,29|HGLibA_00456,208|HGLibB_00454,0|HGLibB_00455,0
SRPRB	370	92.5	4	HGLibA_47031,86|HGLibB_46974,20|HGLibB_46972,71|HGLibB_46973,193|HGLibA_47029,0|HGLibA_47030,0
CARF	368	92	4	HGLibB_07237,160|HGLibA_07245,52|HGLibB_07239,70|HGLibA_07244,86|HGLibA_07243,0|HGLibB_07238,0
CMAS	366	91.5	4	HGLibA_10180,62|HGLibA_10178,103|HGLibB_10170,90|HGLibA_10179,111|HGLibB_10169,0|HGLibB_10168,0
STK39	366	91.5	4	HGLibB_47451,1|HGLibA_47508,113|HGLibB_47450,182|HGLibB_47449,70|HGLibA_47506,0|HGLibA_47507,0
ASCC3	365	91.25	4	HGLibA_03264,91|HGLibB_03260,100|HGLibA_03263,90|HGLibA_03262,84|HGLibB_03262,0|HGLibB_03261,0
NEUROD4	364	91	4	HGLibB_31697,108|HGLibA_31741,80|HGLibB_31696,77|HGLibA_31739,99|HGLibA_31740,0|HGLibB_31698,0
ZFYVE27	364	91	4	HGLibA_55289,83|HGLibB_55220,82|HGLibA_55288,89|HGLibA_55287,110|HGLibB_55222,0|HGLibB_55221,0
IGFBP4	363	90.75	4	HGLibB_22794,120|HGLibA_22825,1|HGLibB_22793,151|HGLibB_22792,91|HGLibA_22824,0|HGLibA_22823,0
CPA6	363	90.75	4	HGLibB_10889,85|HGLibB_10888,73|HGLibA_10899,158|HGLibB_10887,47|HGLibA_10900,0|HGLibA_10898,0
ATP1A2	362	90.5	4	HGLibB_03581,83|HGLibA_03584,95|HGLibB_03582,102|HGLibB_03583,82|HGLibA_03585,0|HGLibA_03583,0
RASA4	362	90.5	4	HGLibA_40306,80|HGLibA_40304,84|HGLibB_40254,63|HGLibB_40253,135|HGLibB_40255,0
SLC35F1	360	90	4	HGLibB_44948,1|HGLibA_45000,98|HGLibB_44949,94|HGLibA_45001,167|HGLibA_45002,0|HGLibB_44947,0
P2RY1	359	89.75	4	HGLibB_34820,95|HGLibA_34867,88|HGLibA_34866,83|HGLibB_34822,93|HGLibA_34868,0|HGLibB_34821,0
TRAM1	356	89	4	HGLibA_51282,82|HGLibB_51220,87|HGLibA_51283,116|HGLibA_51281,71|HGLibB_51219,0|HGLibB_51218,0
PODXL2	355	88.75	4	HGLibA_37463,166|HGLibB_37412,47|HGLibB_37413,66|HGLibA_37461,76|HGLibB_37414,0|HGLibA_37462,0
COL5A1	355	88.75	4	HGLibB_10575,187|HGLibA_10586,1|HGLibA_10587,88|HGLibB_10576,79|HGLibA_10588,0|HGLibB_10577,0
FRMD4A	353	88.25	4	HGLibA_18014,61|HGLibB_17990,210|HGLibA_18013,37|HGLibA_18015,45|HGLibB_17989,0|HGLibB_17991,0
C11orf52	353	88.25	4	HGLibA_05152,80|HGLibB_05147,91|HGLibA_05150,85|HGLibB_05146,97|HGLibB_05148,0|HGLibA_05151,0
RAP2C	353	88.25	4	HGLibA_40242,193|HGLibB_40190,150|HGLibB_40192,2|HGLibB_40191,8|HGLibA_40241,0|HGLibA_40243,0
PKD1L1	352	88	4	HGLibA_36793,87|HGLibA_36792,2|HGLibA_36791,90|HGLibB_36745,173|HGLibB_36746,0|HGLibB_36744,0
ZNF571	351	87.75	4	HGLibA_56279,65|HGLibB_56210,112|HGLibB_56211,81|HGLibB_56212,93|HGLibA_56277,0|HGLibA_56278,0
TPRKB	348	87	4	HGLibB_51122,41|HGLibB_51123,84|HGLibB_51124,54|HGLibA_51185,169|HGLibA_51186,0|HGLibA_51187,0
AADAT	347	86.75	4	HGLibA_00040,98|HGLibA_00041,93|HGLibB_00041,153|HGLibA_00042,3|HGLibB_00042,0|HGLibB_00040,0
U2SURP	347	86.75	4	HGLibB_52435,34|HGLibA_52500,78|HGLibB_52437,152|HGLibB_52436,83|HGLibA_52501,0|HGLibA_52502,0
TCEAL2	344	86	4	HGLibA_48708,80|HGLibB_48649,87|HGLibB_48648,87|HGLibB_48647,90|HGLibA_48707,0|HGLibA_48706,0
OR6T1	343	85.75	4	HGLibB_34401,171|HGLibB_34399,84|HGLibB_34400,87|HGLibA_34446,1|HGLibA_34444,0|HGLibA_34445,0
PCSK7	342	85.5	4	HGLibB_35638,173|HGLibA_35684,2|HGLibB_35637,86|HGLibB_35639,81|HGLibA_35686,0|HGLibA_35685,0
PENK	342	85.5	4	HGLibA_36048,268|HGLibB_36002,1|HGLibA_36047,68|HGLibB_36001,5|HGLibB_36000,0|HGLibA_36049,0
SENP3	341	85.25	4	HGLibA_43392,91|HGLibB_43338,69|HGLibB_43339,81|HGLibA_43390,100|HGLibA_43391,0|HGLibB_43337,0
COX7B	340	85	4	HGLibA_10865,83|HGLibB_10855,124|HGLibB_10856,49|HGLibB_10854,84|HGLibA_10866,0|HGLibA_10867,0
UPP1	337	84.25	4	HGLibB_53021,85|HGLibA_53087,57|HGLibA_53085,94|HGLibB_53020,101|HGLibA_53086,0|HGLibB_53022,0
EPS8L1	335	83.75	4	HGLibA_15378,63|HGLibA_15376,41|HGLibA_15377,1|HGLibB_15356,230|HGLibB_15354,0|HGLibB_15355,0
TRAPPC8	334	83.5	4	HGLibA_51335,3|HGLibB_51274,145|HGLibB_51272,94|HGLibA_51337,92|HGLibA_51336,0|HGLibB_51273,0
CORO6	331	82.75	4	HGLibA_10789,92|HGLibA_10787,40|HGLibB_10776,67|HGLibB_10777,132|HGLibA_10788,0|HGLibB_10778,0
RASL12	330	82.5	4	HGLibA_40372,177|HGLibB_40320,78|HGLibA_40370,1|HGLibB_40321,74|HGLibB_40319,0|HGLibA_40371,0
WDR83OS	329	82.25	4	HGLibA_54195,87|HGLibB_54129,76|HGLibB_54130,88|HGLibB_54131,78|HGLibA_54197,0|HGLibA_54196,0
KCNJ8	329	82.25	4	HGLibB_24254,49|HGLibB_24253,110|HGLibA_24289,81|HGLibA_24287,89|HGLibA_24288,0|HGLibB_24255,0
LRP11	329	82.25	4	HGLibB_27164,89|HGLibB_27162,58|HGLibA_27204,93|HGLibB_27163,89|HGLibA_27202,0|HGLibA_27203,0
OXSR1	328	82	4	HGLibA_34838,79|HGLibB_34792,83|HGLibB_34790,73|HGLibB_34791,93|HGLibA_34836,0|HGLibA_34837,0
ID2	328	82	4	HGLibA_22526,67|HGLibB_22495,1|HGLibB_22497,170|HGLibA_22527,90|HGLibA_22528,0|HGLibB_22496,0
BPHL	328	82	4	HGLibA_04704,90|HGLibB_04702,143|HGLibA_04703,68|HGLibA_04705,27|HGLibB_04703,0|HGLibB_04701,0
ZNF395	326	81.5	4	HGLibB_55844,189|HGLibB_55846,8|HGLibA_55911,68|HGLibA_55913,61|HGLibB_55845,0|HGLibA_55912,0
OR3A3	325	81.25	4	HGLibA_33919,45|HGLibB_33875,150|HGLibA_33920,85|HGLibB_33876,45|HGLibA_33921,0|HGLibB_33874,0
CD97	324	81	4	HGLibB_08478,85|HGLibB_08480,82|HGLibA_08487,1|HGLibB_08479,156|HGLibA_08486,0|HGLibA_08485,0
ANK3	322	80.5	4	HGLibA_01941,78|HGLibB_01939,1|HGLibB_01937,148|HGLibA_01939,95|HGLibB_01938,0|HGLibA_01940,0
BST2	321	80.25	4	HGLibB_04882,82|HGLibA_04885,46|HGLibB_04881,79|HGLibA_04883,114|HGLibA_04884,0|HGLibB_04880,0
PQLC3	320	80	4	HGLibA_38256,80|HGLibB_38209,68|HGLibA_38257,96|HGLibB_38208,76|HGLibA_38258,0|HGLibB_38207,0
ARHGAP28	320	80	4	HGLibA_02746,97|HGLibB_02745,1|HGLibB_02746,36|HGLibA_02747,186|HGLibB_02744,0|HGLibA_02748,0
IP6K3	320	80	4	HGLibA_23452,94|HGLibB_23419,1|HGLibA_23450,142|HGLibB_23420,83|HGLibA_23451,0|HGLibB_23418,0
CCL5	319	79.75	4	HGLibA_08035,79|HGLibA_08037,59|HGLibB_08029,89|HGLibA_08036,92|HGLibB_08030,0|HGLibB_08028,0
SPOCK3	317	79.25	4	HGLibB_46698,1|HGLibA_46754,96|HGLibB_46697,36|HGLibA_46755,184|HGLibB_46696,0|HGLibA_46753,0
GGTLC1	316	79	4	HGLibB_18998,71|HGLibB_18996,103|HGLibA_19022,60|HGLibB_18997,82|HGLibA_19023,0|HGLibA_19021,0
DEFB132	314	78.5	4	HGLibB_12883,79|HGLibA_12899,86|HGLibA_12901,68|HGLibB_12884,81|HGLibA_12900,0|HGLibB_12885,0
ABHD17B	314	78.5	4	HGLibA_00265,1|HGLibB_00265,142|HGLibA_00267,114|HGLibB_00267,57|HGLibA_00266,0|HGLibB_00266,0
GGCX	314	78.5	4	HGLibB_18969,80|HGLibA_18996,161|HGLibB_18971,68|HGLibA_18994,5|HGLibB_18970,0|HGLibA_18995,0
NUMBL	313	78.25	4	HGLibA_33016,1|HGLibA_33014,83|HGLibB_32970,84|HGLibB_32972,145|HGLibB_32971,0|HGLibA_33015,0
IQCB1	311	77.75	4	HGLibB_23457,46|HGLibA_23489,92|HGLibB_23458,90|HGLibA_23490,83|HGLibB_23456,0|HGLibA_23491,0
OSMR	310	77.5	4	HGLibB_34650,83|HGLibA_34696,105|HGLibB_34652,31|HGLibB_34651,91|HGLibA_34697,0|HGLibA_34695,0
ZNF304	310	77.5	4	HGLibB_55709,83|HGLibA_55778,91|HGLibA_55777,51|HGLibB_55710,85|HGLibA_55776,0|HGLibB_55711,0
HNRNPF	309	77.25	4	HGLibA_21820,82|HGLibB_21789,2|HGLibA_21818,48|HGLibB_21790,177|HGLibB_21791,0|HGLibA_21819,0
MICAL2	306	76.5	4	HGLibB_29164,71|HGLibB_29163,41|HGLibA_29204,90|HGLibA_29205,104|HGLibB_29162,0|HGLibA_29203,0
SLC35B3	305	76.25	4	HGLibB_44911,131|HGLibA_44964,1|HGLibB_44913,89|HGLibA_44966,84|HGLibB_44912,0|HGLibA_44965,0
TCF23	302	75.5	4	HGLibB_48718,42|HGLibA_48777,85|HGLibB_48716,95|HGLibA_48775,80|HGLibB_48717,0|HGLibA_48776,0
CCDC140	301	75.25	4	HGLibB_07610,89|HGLibA_07615,79|HGLibB_07611,93|HGLibA_07617,40|HGLibB_07609,0|HGLibA_07616,0
PRSS35	297	74.25	4	HGLibA_38929,77|HGLibA_38930,150|HGLibB_38880,2|HGLibB_38881,68|HGLibA_38928,0|HGLibB_38879,0
DENND1A	297	74.25	4	HGLibB_12911,38|HGLibB_12910,95|HGLibB_12912,91|HGLibA_12928,73|HGLibA_12930,0|HGLibA_12929,0
HNMT	296	74	4	HGLibA_21787,118|HGLibA_21785,94|HGLibA_21786,83|HGLibB_21757,1|HGLibB_21758,0|HGLibB_21756,0
SMIM17	295	73.75	4	HGLibA_45738,75|HGLibB_45683,69|HGLibB_45681,150|HGLibB_45682,1|HGLibA_45736,0|HGLibA_45737,0
TAS2R10	295	73.75	4	HGLibB_48308,154|HGLibB_48306,37|HGLibA_48367,67|HGLibB_48307,37|HGLibA_48365,0|HGLibA_48366,0
MIER2	294	73.5	4	HGLibA_29256,1|HGLibA_29254,209|HGLibB_29214,1|HGLibA_29255,83|HGLibB_29215,0|HGLibB_29213,0
PIK3R1	291	72.75	4	HGLibA_36648,88|HGLibB_36600,65|HGLibB_36601,82|HGLibA_36647,56|HGLibA_36649,0|HGLibB_36602,0
PHF11	287	71.75	4	HGLibB_36289,39|HGLibB_36288,93|HGLibA_36335,70|HGLibB_36290,85|HGLibA_36336,0|HGLibA_36337,0
BET1	285	71.25	4	HGLibB_04430,70|HGLibA_04431,56|HGLibB_04428,79|HGLibA_04432,80|HGLibA_04430,0|HGLibB_04429,0
BMP6	272	68	4	HGLibA_04615,103|HGLibB_04611,86|HGLibB_04613,82|HGLibA_04614,1|HGLibA_04613,0|HGLibB_04612,0
PPP1R11	268	67	4	HGLibA_38018,82|HGLibA_38017,2|HGLibB_37967,165|HGLibB_37969,19|HGLibA_38016,0|HGLibB_37968,0
INHBB	266	66.5	4	HGLibA_23303,39|HGLibA_23305,88|HGLibA_23304,67|HGLibB_23271,72|HGLibB_23272,0|HGLibB_23273,0
FMN1	264	66	4	HGLibB_17665,190|HGLibA_17686,72|HGLibA_17688,1|HGLibB_17663,1|HGLibB_17664,0|HGLibA_17687,0
LRRC3B	262	65.5	4	HGLibA_27344,1|HGLibA_27343,81|HGLibB_27303,95|HGLibB_27305,85|HGLibB_27304,0|HGLibA_27345,0
CNN2	262	65.5	4	HGLibA_10308,93|HGLibB_10296,71|HGLibA_10307,47|HGLibB_10297,51|HGLibB_10298,0|HGLibA_10309,0
NOX4	261	65.25	4	HGLibB_32332,72|HGLibA_32375,63|HGLibA_32377,52|HGLibA_32376,74|HGLibB_32331,0|HGLibB_32333,0
XIRP1	259	64.75	4	HGLibA_54512,48|HGLibA_54510,105|HGLibB_54444,1|HGLibB_54445,105|HGLibB_54443,0|HGLibA_54511,0
KRT77	258	64.5	4	HGLibB_25507,100|HGLibA_25543,50|HGLibA_25544,104|HGLibB_25508,4|HGLibB_25506,0|HGLibA_25542,0
TMEM191C	256	64	4	HGLibA_50147,43|HGLibB_50086,88|HGLibB_50088,66|HGLibA_50148,59|HGLibA_50146,0|HGLibB_50087,0
NDUFA7	254	63.5	4	HGLibB_31428,38|HGLibA_31469,77|HGLibB_31429,70|HGLibA_31470,69|HGLibB_31427,0|HGLibA_31471,0
YWHAE	253	63.25	4	HGLibB_54676,2|HGLibA_54741,129|HGLibB_54674,36|HGLibA_54743,86|HGLibA_54742,0|HGLibB_54675,0
RAB9B	251	62.75	4	HGLibB_39944,89|HGLibB_39943,89|HGLibA_39995,72|HGLibA_39993,1|HGLibB_39942,0|HGLibA_39994,0
FIBCD1	248	62	4	HGLibA_17498,78|HGLibA_17497,1|HGLibA_17499,88|HGLibB_17476,81|HGLibB_17475,0|HGLibB_17474,0
COPZ2	247	61.75	4	HGLibA_10740,1|HGLibB_10730,82|HGLibA_10739,81|HGLibB_10728,83|HGLibB_10729,0|HGLibA_10741,0
NINJ2	246	61.5	4	HGLibA_31941,74|HGLibB_31897,91|HGLibB_31898,80|HGLibA_31940,1|HGLibB_31899,0|HGLibA_31942,0
CACNG2	243	60.75	4	HGLibA_06931,72|HGLibB_06926,76|HGLibB_06927,39|HGLibA_06932,56|HGLibA_06933,0|HGLibB_06928,0
CRYGD	243	60.75	4	HGLibB_11267,71|HGLibB_11268,51|HGLibA_11280,1|HGLibB_11266,120|HGLibA_11278,0|HGLibA_11279,0
RRAGB	239	59.75	4	HGLibB_42173,85|HGLibB_42175,20|HGLibA_42227,69|HGLibA_42228,65|HGLibB_42174,0|HGLibA_42226,0
NUPL2	237	59.25	4	HGLibA_33085,92|HGLibB_33039,33|HGLibA_33083,60|HGLibB_33040,52|HGLibA_33084,0|HGLibB_33041,0
PTGR2	236	59	4	HGLibB_39307,65|HGLibB_39305,79|HGLibA_39355,91|HGLibA_39356,1|HGLibA_39354,0|HGLibB_39306,0
CLEC17A	235	58.75	4	HGLibA_09940,65|HGLibB_09932,80|HGLibB_09930,41|HGLibB_09931,49|HGLibA_09941,0|HGLibA_09939,0
TNPO3	230	57.5	4	HGLibB_50842,75|HGLibB_50841,68|HGLibA_50903,86|HGLibB_50843,1|HGLibA_50904,0|HGLibA_50905,0
CYP4F22	224	56	4	HGLibB_12176,1|HGLibA_12191,30|HGLibB_12177,98|HGLibB_12178,95|HGLibA_12189,0|HGLibA_12190,0
KIAA0232	221	55.25	4	HGLibB_24577,88|HGLibB_24576,93|HGLibA_24611,2|HGLibA_24612,38|HGLibA_24610,0|HGLibB_24578,0
ZNF670	220	55	4	HGLibA_56499,59|HGLibB_56433,88|HGLibB_56434,1|HGLibA_56501,72|HGLibB_56432,0|HGLibA_56500,0
C1S	218	54.5	4	HGLibB_05972,1|HGLibB_05970,72|HGLibA_05975,47|HGLibB_05971,98|HGLibA_05974,0|HGLibA_05976,0
MSL1	212	53	4	HGLibB_30169,48|HGLibA_30211,63|HGLibB_30170,100|HGLibA_30212,1|HGLibB_30171,0|HGLibA_30210,0
ADAM33	200	50	4	HGLibB_00773,69|HGLibA_00776,1|HGLibA_00775,74|HGLibA_00777,56|HGLibB_00774,0|HGLibB_00775,0
RHOJ	198	49.5	4	HGLibA_41196,7|HGLibA_41195,20|HGLibB_41146,1|HGLibB_41144,170|HGLibA_41197,0|HGLibB_41145,0
ZNF492	198	49.5	4	HGLibA_56094,174|HGLibA_56096,22|HGLibB_56028,1|HGLibA_56095,1|HGLibB_56027,0|HGLibB_56029,0
FLT1	189	47.25	4	HGLibB_17641,79|HGLibA_17663,42|HGLibA_17664,1|HGLibB_17640,67|HGLibA_17662,0|HGLibB_17639,0
MAT2A	180	45	4	HGLibA_28418,102|HGLibA_28417,42|HGLibB_28376,34|HGLibA_28419,2|HGLibB_28378,0|HGLibB_28377,0
CUL4B	130	32.5	4	HGLibA_11785,1|HGLibB_11773,85|HGLibA_11784,1|HGLibB_11772,43|HGLibB_11774,0|HGLibA_11786,0
VAX1	91	22.75	4	HGLibB_53492,1|HGLibA_53557,1|HGLibA_53556,1|HGLibB_53491,88|HGLibB_53490,0|HGLibA_53558,0
